# Supplementary material for: Hypothalamic Menin regulates systemic aging and cognitive decline
Source: PubMed Central journal article supplement (PMC10019680; doi:10.1371/journal.pbio.3002033), 2023-03-16
Supplement: pbio.3002033.s012.pdf [file pbio.3002033.s012.pdf]

SourceData\_Gel\_Fig 1

Fig 1A

Menin

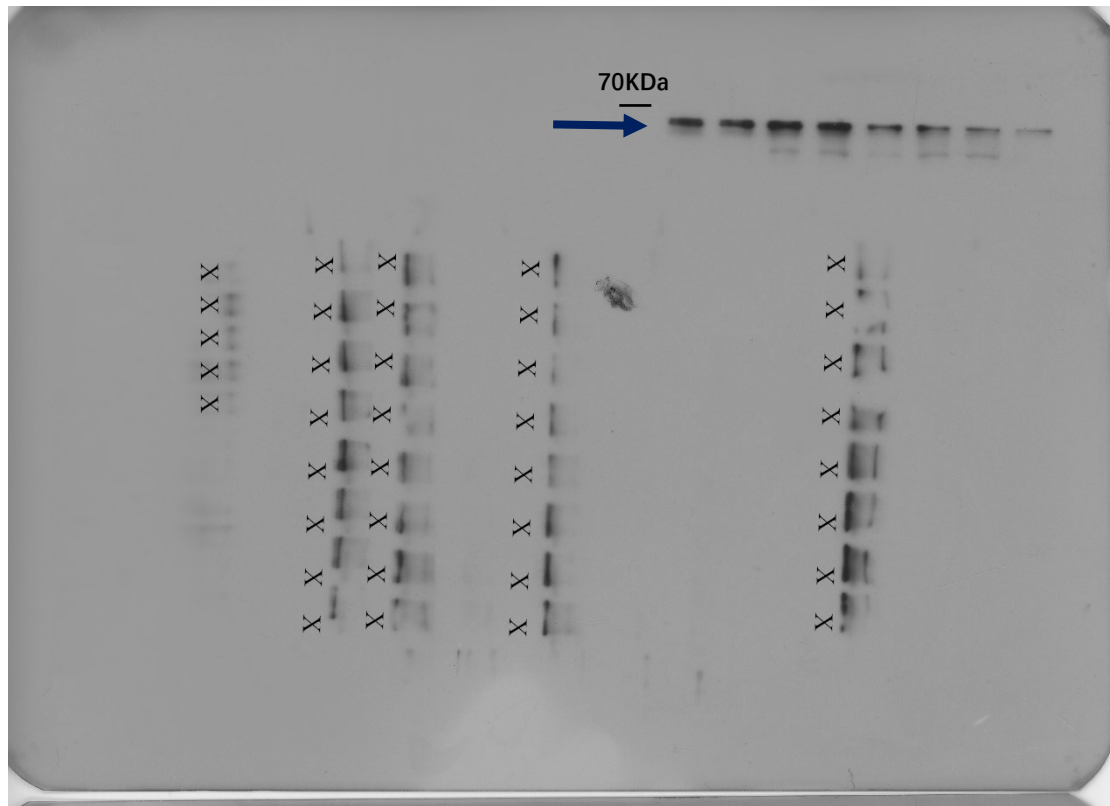

**Loading order** —————>

**Identity of experimental samples:**

lane 1-4: Protein samples from the hypothalamus of young (3M) mice 1-4; lane 5-8: Protein samples from the hypothalamus of old (20M) mice 1-4.

**Method used to capture the image:**

Chemiluminescence. The bands were captured by developer and fixing solution on medical blue sensitive x-ray film (Baiyun, China), then the bands on the blots were scanned and analyzed with ImageJ (National Institutes of Health, Bethesda, MD, USA).

## Actin

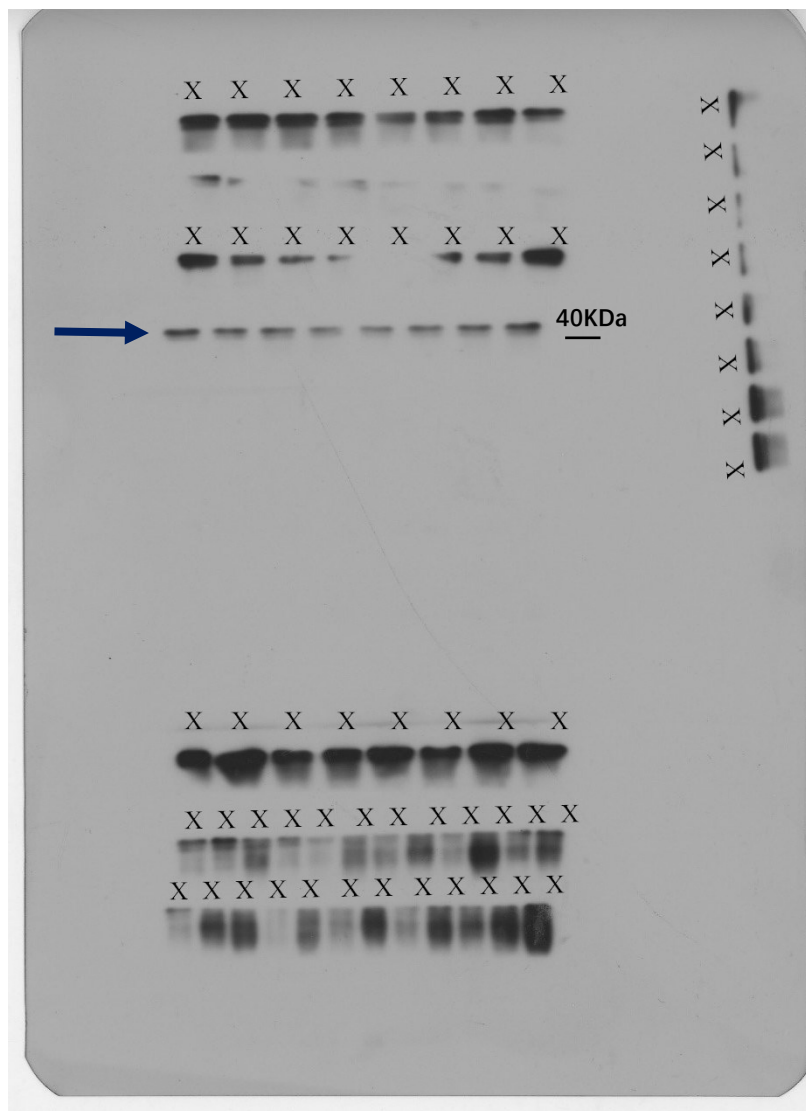

**Loading order** →

### **Identity of experimental samples:**

lane 1-4: Protein samples from the hypothalamus of young (3M) mice 1-4; lane 5-8: Protein samples from the hypothalamus of old (20M) mice 1-4.

### **Method used to capture the image:**

Chemiluminescence. The bands were captured by developer and fixing solution on medical blue sensitive x-ray film (Baiyun, China), then the bands on the blots were scanned and analyzed with ImageJ (National Institutes of Health, Bethesda, MD, USA).

**Fig 1E**  
**Menin**

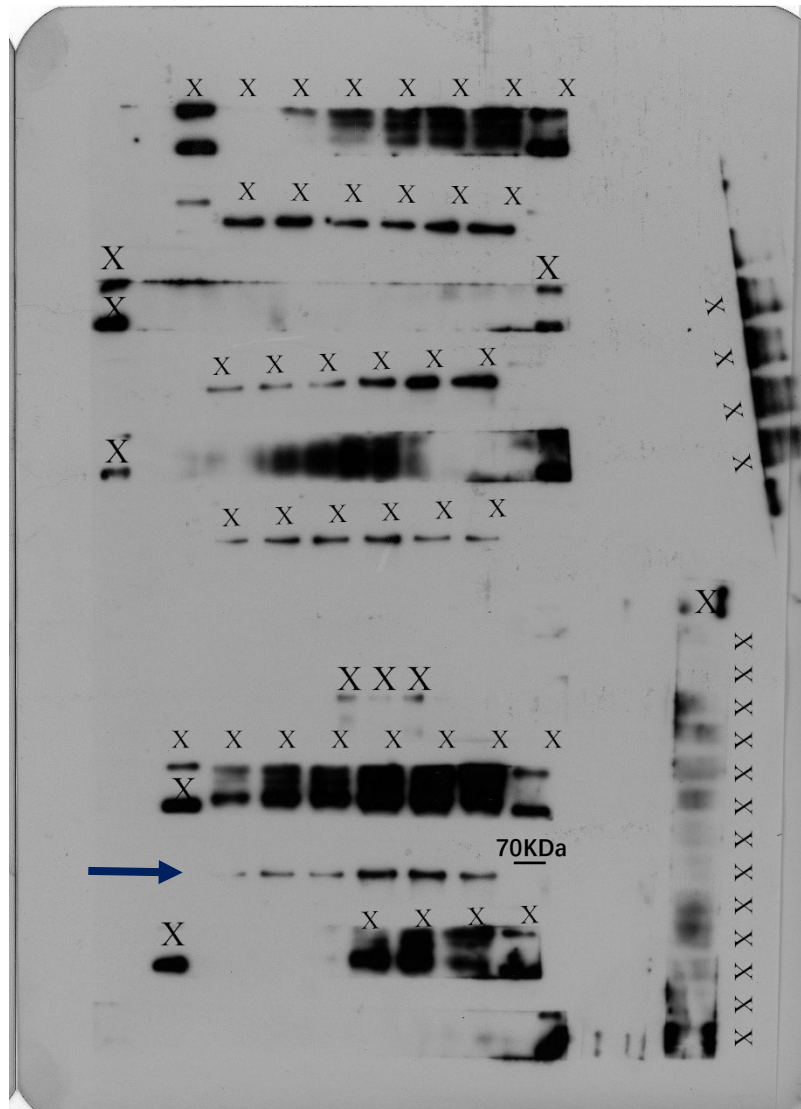

**Loading order** →

**Identity of experimental samples:**

lane 1-3: Protein samples from the hypothalamus of young (3M) mice 1-3; lane 4-6: Protein samples from the hypothalamus of old (20M) mice 1-3.

**Method used to capture the image:**

Chemiluminescence. The bands were captured by developer and fixing solution on medical blue sensitive x-ray film (Baiyun, China), then the bands on the blots were scanned and analyzed with ImageJ (National Institutes of Health, Bethesda, MD, USA).

## Actin

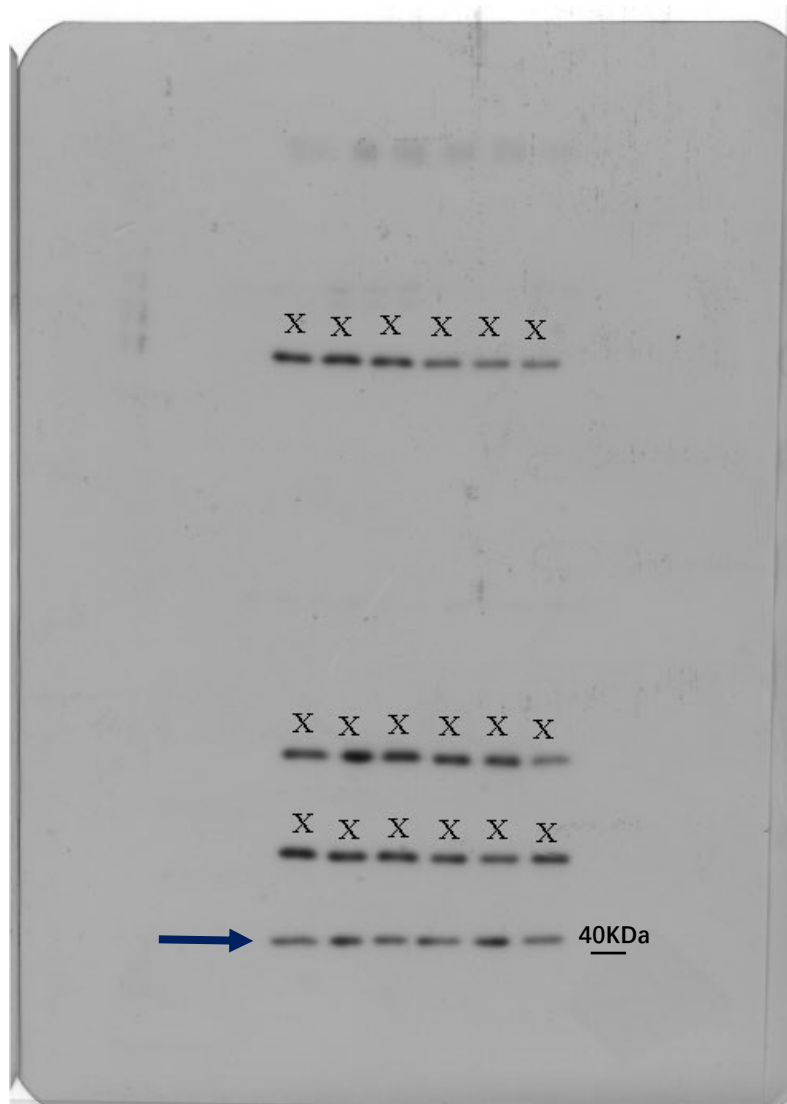

**Loading order** →

**Identity of experimental samples:**

lane 1-3: Protein samples from the hypothalamus of young (3M) mice 1-3; lane 4-6: Protein samples from the hypothalamus of old (20M) mice 1-3.

**Method used to capture the image:**

Chemiluminescence. The bands were captured by developer and fixing solution on medical blue sensitive x-ray film (Baiyun, China), then the bands on the blots were scanned and analyzed with ImageJ (National Institutes of Health, Bethesda, MD, USA).



**Fig 11**  
**Menin**

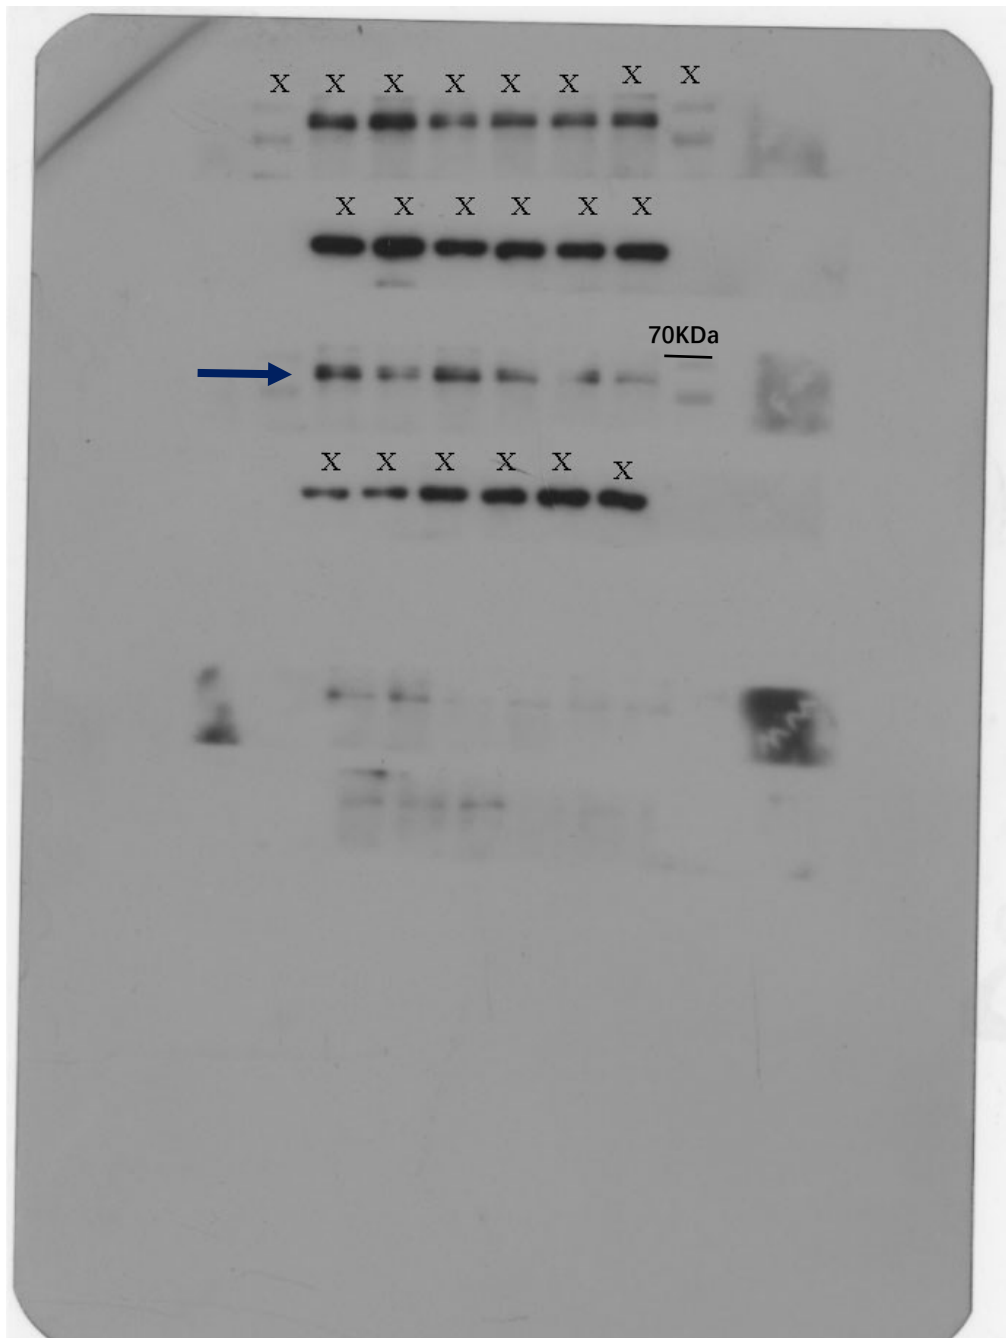

**Loading order** →

**Identity of experimental samples:**

lane 1-3: Protein samples from the hypothalamus of 6M *Men1<sup>fl/fl</sup>* mice 1-3; lane 4-6: Protein samples from the hypothalamus of 6M ScKO mice 1-3.

**Method used to capture the image:**

Chemiluminescence. The bands were captured by developer and fixing solution on medical blue sensitive x-ray film (Baiyun, China), then the bands on the blots were scanned and analyzed with ImageJ (National Institutes of Health, Bethesda, MD, USA).

## Actin

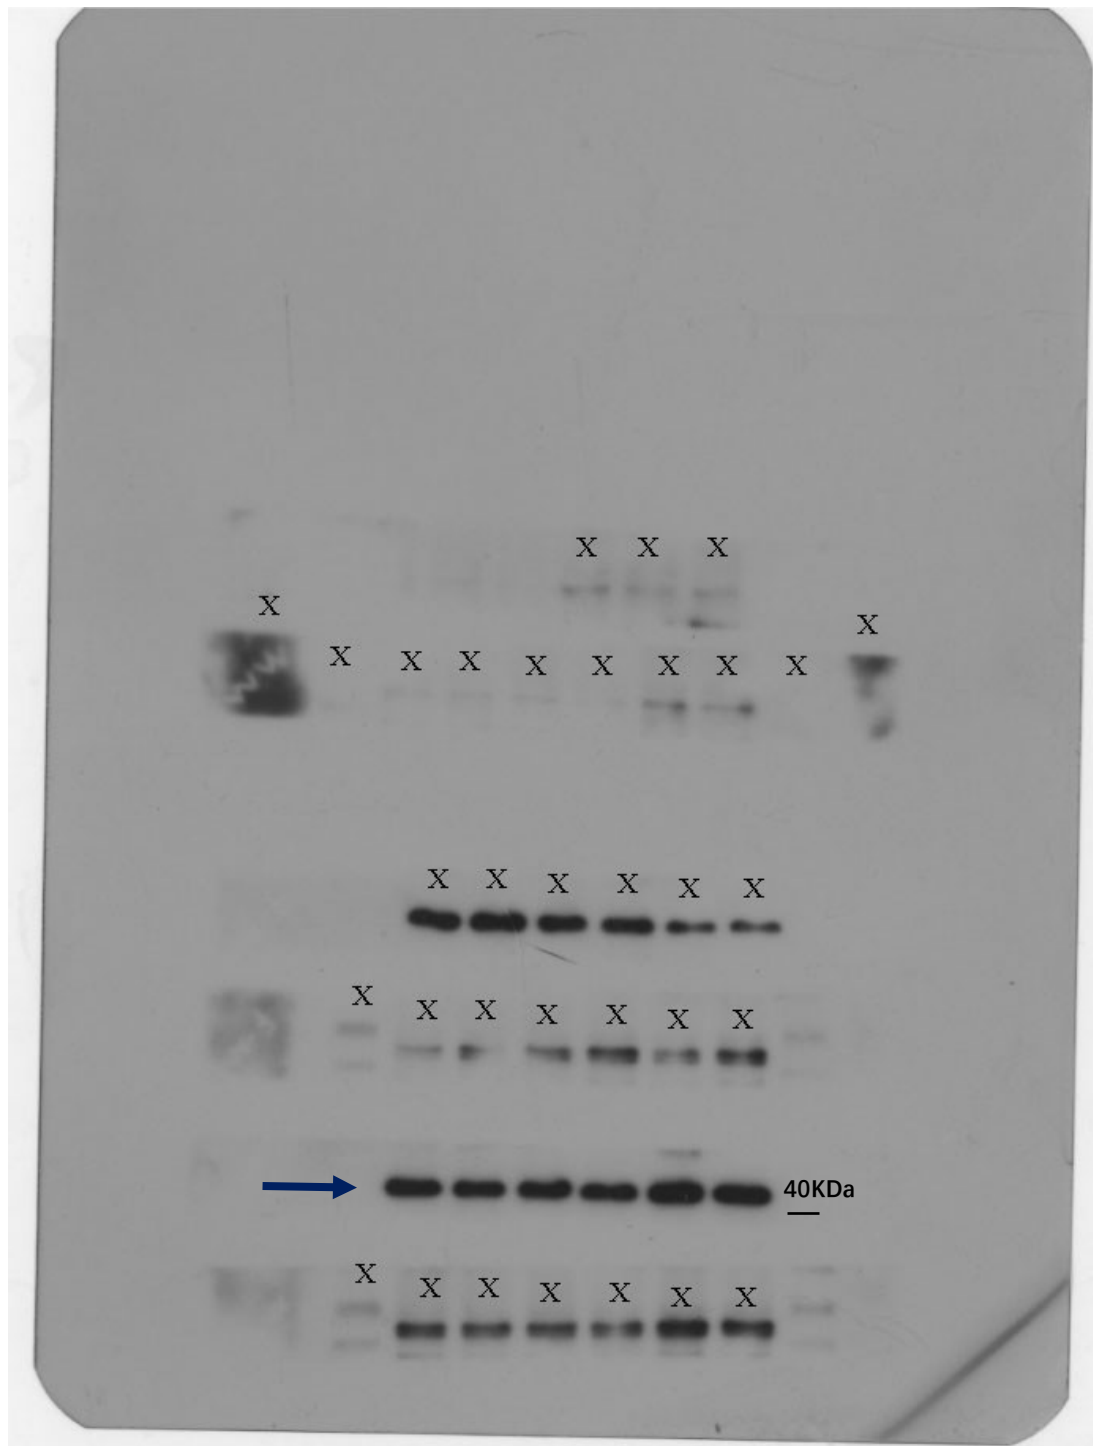

loading order →

### Identity of experimental samples:

lane 1-3: Protein samples from the hypothalamus of 6M *Men1<sup>flf</sup>* mice 1-3; lane 4-6: Protein samples from the hypothalamus of 6M ScKO mice 1-3.

### Method used to capture the image:

Chemiluminescence. The bands were captured by developer and fixing solution on medical blue sensitive x-ray film (Baiyun, China), then the bands on the blots were scanned and analyzed with ImageJ (National Institutes of Health, Bethesda, MD, USA).

**Fig 1M**  
**IL-1 $\beta$**

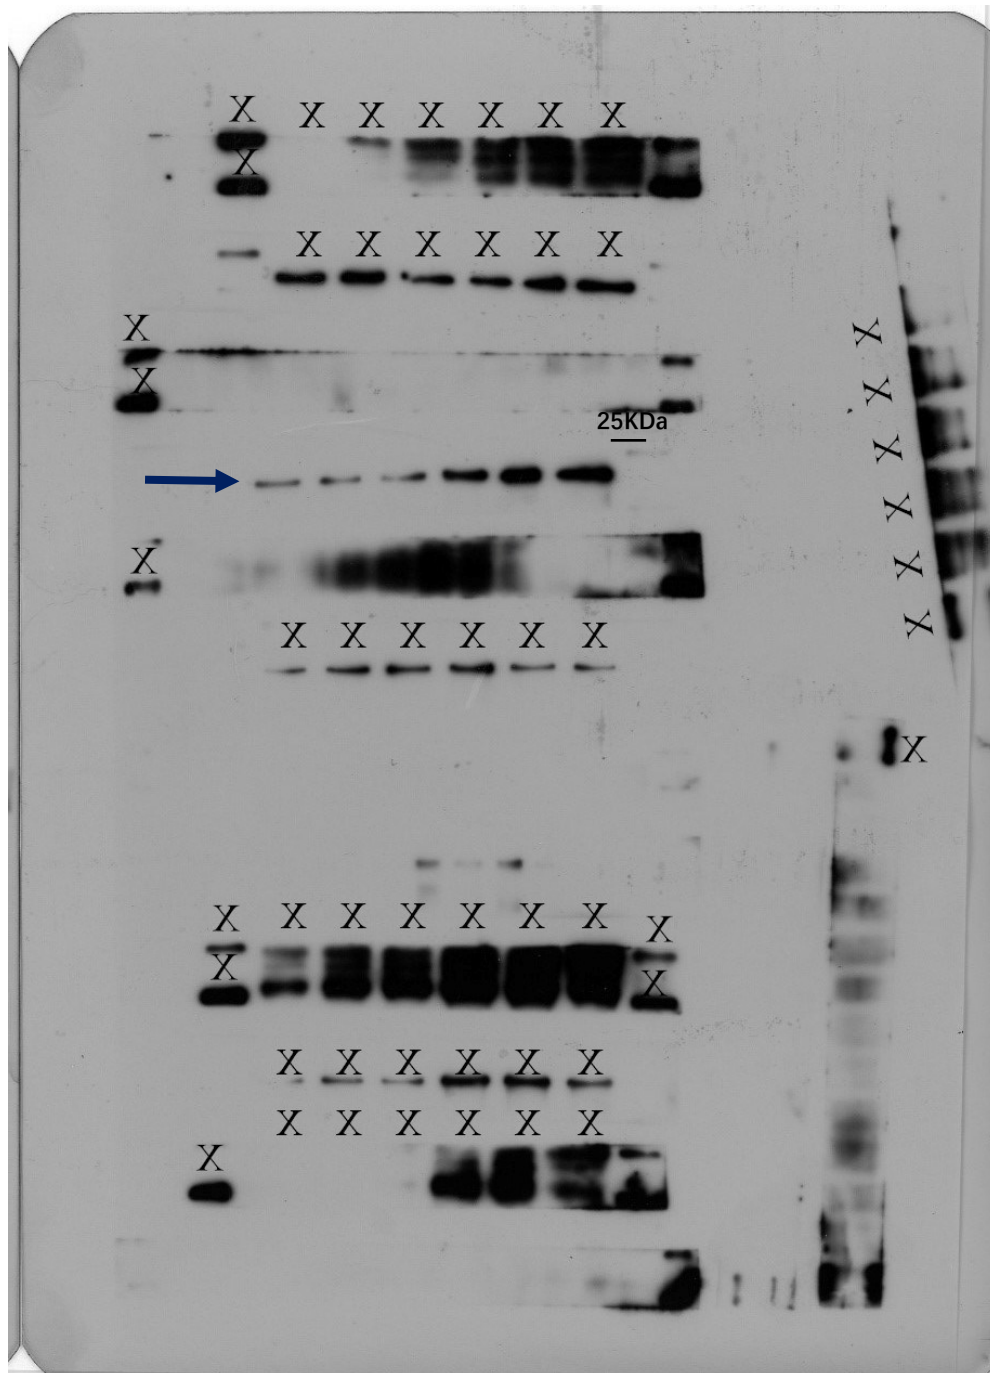

**Loading order**  $\longrightarrow$

**Identity of experimental samples:**

lane 1-3: Protein samples from the hypothalamus of 6M *Men1<sup>fl/fl</sup>* mice 1-3; lane 4-6: Protein samples from the hypothalamus of 6M ScKO mice 1-3.

**Method used to capture the image:**

Chemiluminescence. The bands were captured by developer and fixing solution on medical blue sensitive x-ray film (Baiyun, China), then the bands on the blots were scanned and analyzed with ImageJ (National Institutes of Health, Bethesda, MD, USA).

## Actin

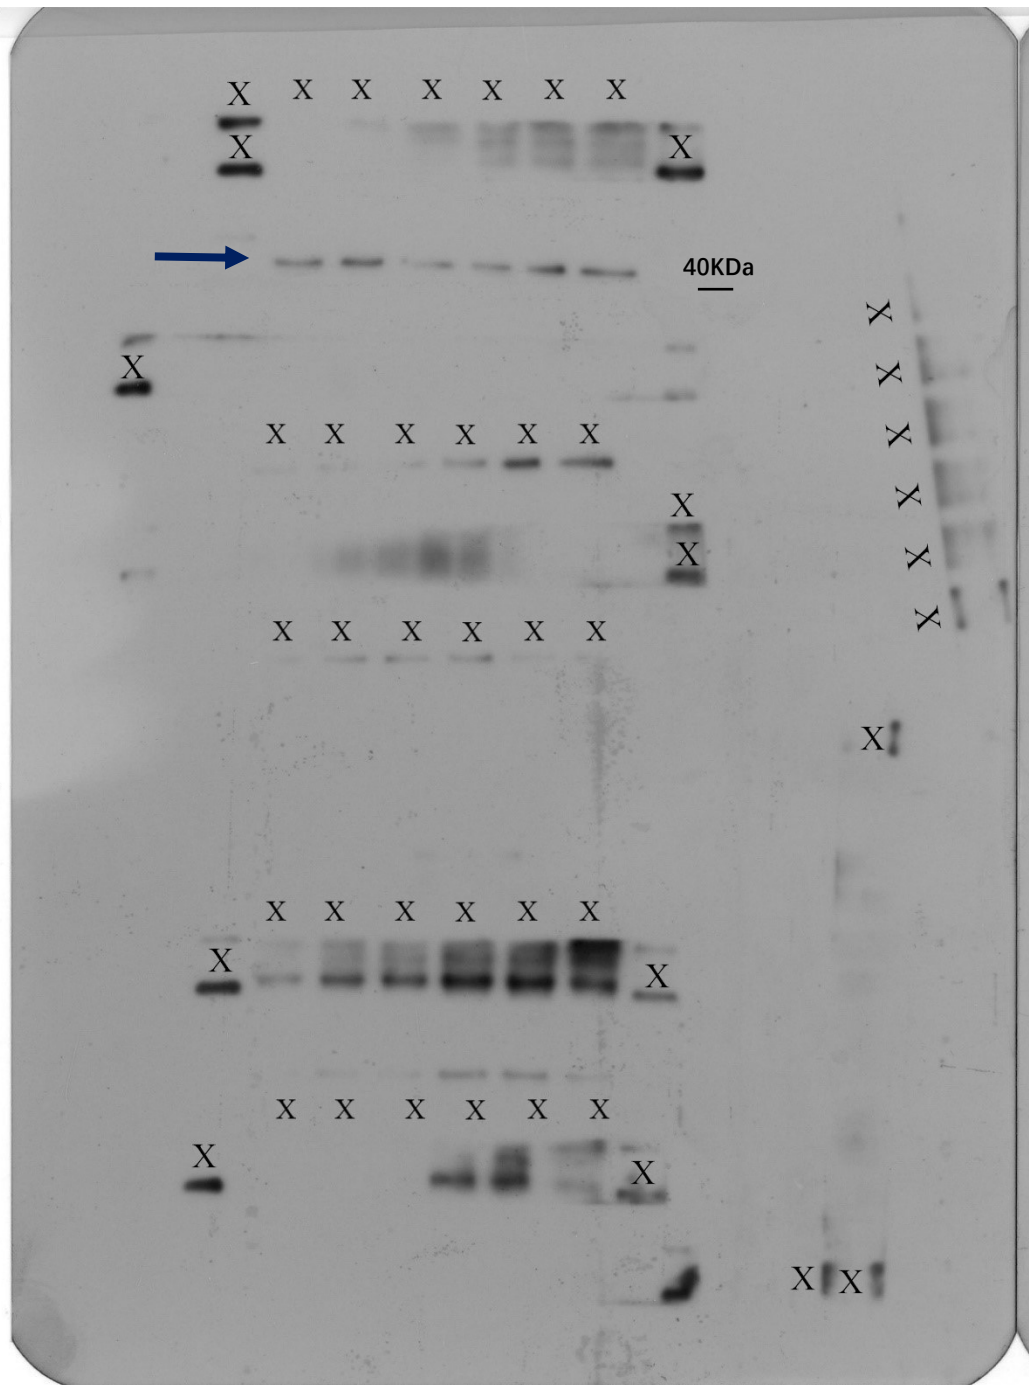

**Loading order** →

### **Identity of experimental samples:**

lane 1-3: Protein samples from the hypothalamus of 6M *Men1<sup>fl/fl</sup>* mice 1-3; lane 4-6: Protein samples from the hypothalamus of 6M ScKO mice 1-3.

### **Method used to capture the image:**

Chemiluminescence. The bands were captured by developer and fixing solution on medical blue sensitive x-ray film (Baiyun, China), then the bands on the blots were scanned and analyzed with ImageJ (National Institutes of Health, Bethesda, MD, USA).

Fig 2D

Menin

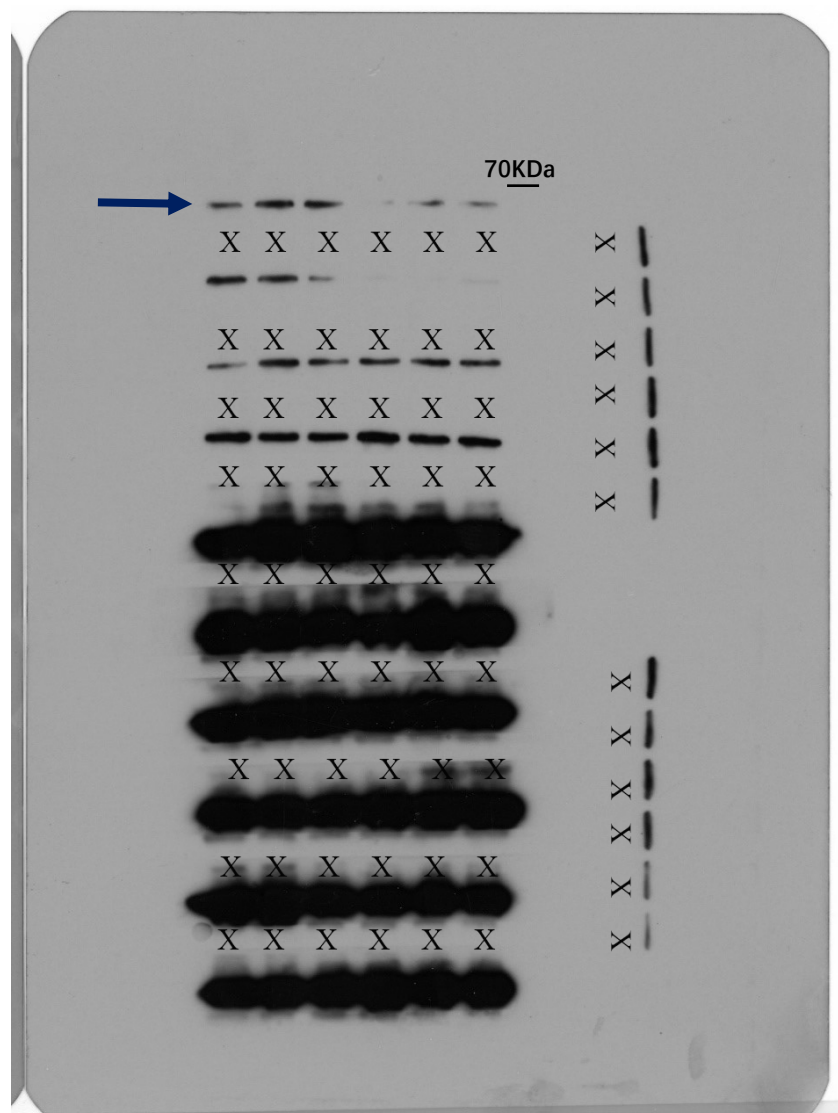

Loading order →

**Identity of experimental samples:**

lane 1-3: Protein samples from the hypothalamus of 10M AAV-CAG-Cre mice 1-3; lane 4-6: Protein samples from the hypothalamus of 10M AAV-CAG-Cre-*Men1*<sup>f/f</sup> mice 1-3.

**Method used to capture the image:**

Chemiluminescence. The bands were captured by developer and fixing solution on medical blue sensitive x-ray film (Baiyun, China), then the bands on the blots were scanned and analyzed with ImageJ (National Institutes of Health, Bethesda, MD, USA).

## Actin

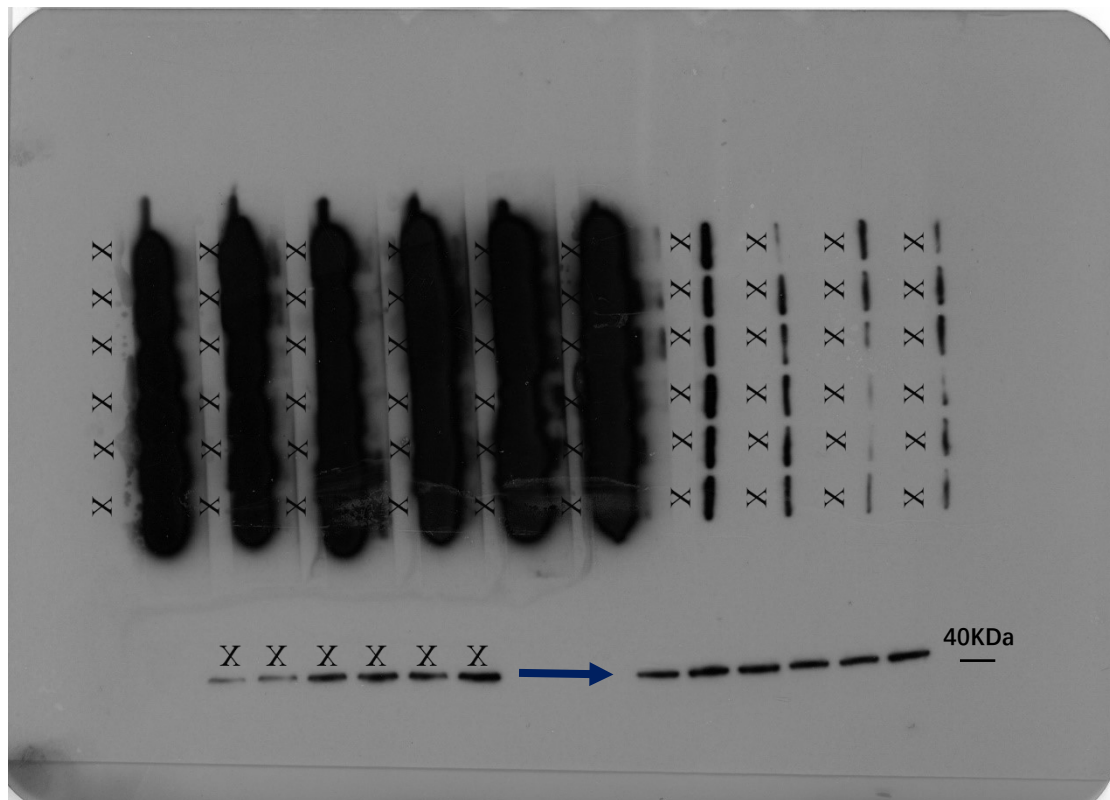

**Loading order** →

### **Identity of experimental samples:**

lane 1-3: Protein samples from the hypothalamus of 10M AAV-CAG-Cre mice 1-3; lane 4-6: Protein samples from the hypothalamus of 10M AAV-CAG-Cre-*Men1*<sup>fl/fl</sup> mice 1-3.

### **Method used to capture the image:**

Chemiluminescence. The bands were captured by developer and fixing solution on medical blue sensitive x-ray film (Baiyun, China), then the bands on the blots were scanned and analyzed with ImageJ (National Institutes of Health, Bethesda, MD, USA).



**Fig 2P**  
**IL-1 $\beta$**

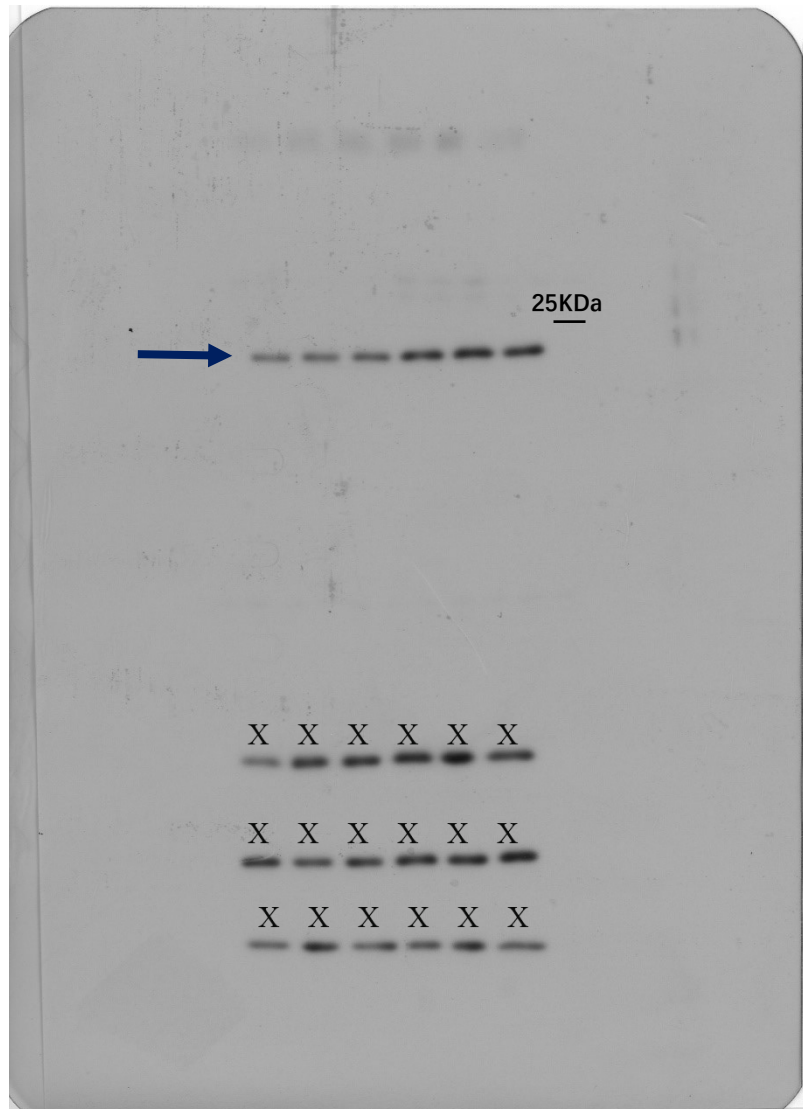

**Loading order**  $\longrightarrow$

**Identity of experimental samples:**

lane 1-3: Protein samples from the hypothalamus of 10M AAV-CAG-Cre mice 1-3; lane 4-6: Protein samples from the hypothalamus of 10M AAV-CAG-Cre-*Men1*<sup>f/f</sup> mice 1-3.

**Method used to capture the image:**

Chemiluminescence. The bands were captured by developer and fixing solution on medical blue sensitive x-ray film (Baiyun, China), then the bands on the blots were scanned and analyzed with ImageJ (National Institutes of Health, Bethesda, MD, USA).



**Actin**

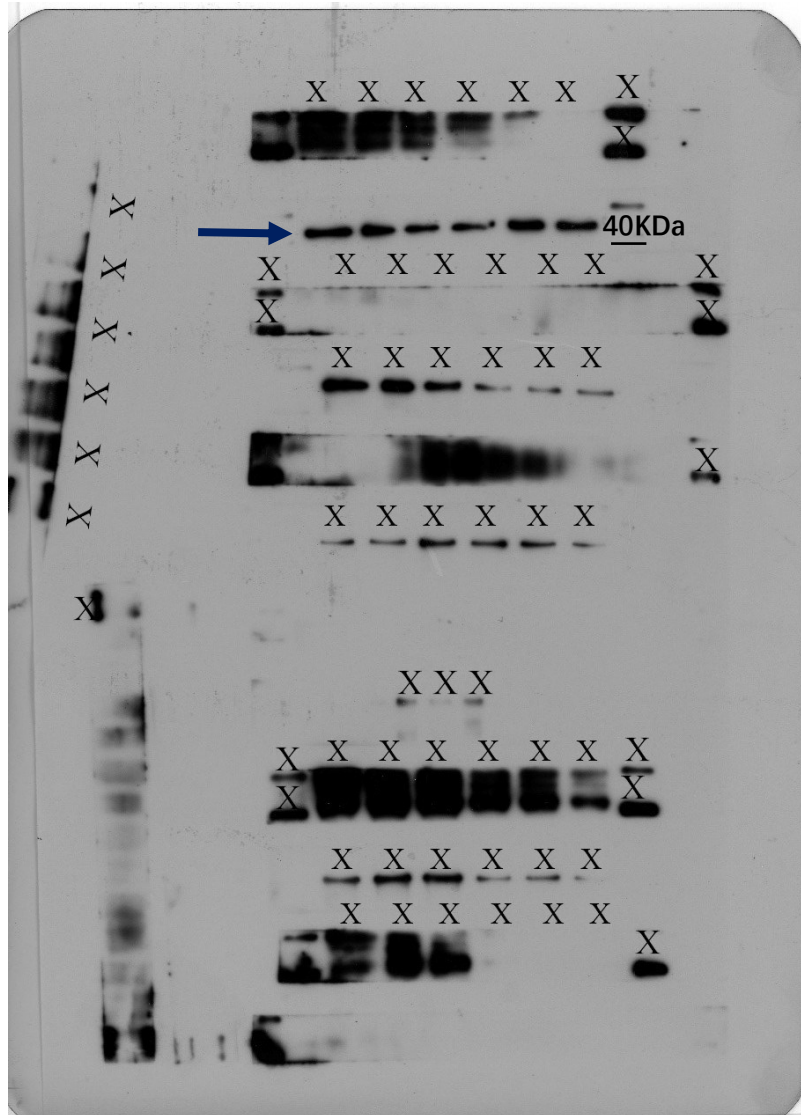

**Loading order** →

**Identity of experimental samples:**

lane 1-3: Protein samples from the hypothalamus of 10M AAV-CAG-Cre mice 1-3; lane 4-6: Protein samples from the hypothalamus of 10M AAV-CAG-Cre-*Men1*<sup>f/f</sup> mice 1-3.

**Method used to capture the image:**

Chemiluminescence. The bands were captured by developer and fixing solution on medical blue sensitive x-ray film (Baiyun, China), then the bands on the blots were scanned and analyzed with ImageJ (National Institutes of Health, Bethesda, MD, USA).

SourceData\_Gel\_Fig 4

Fig 4D

PHGDH

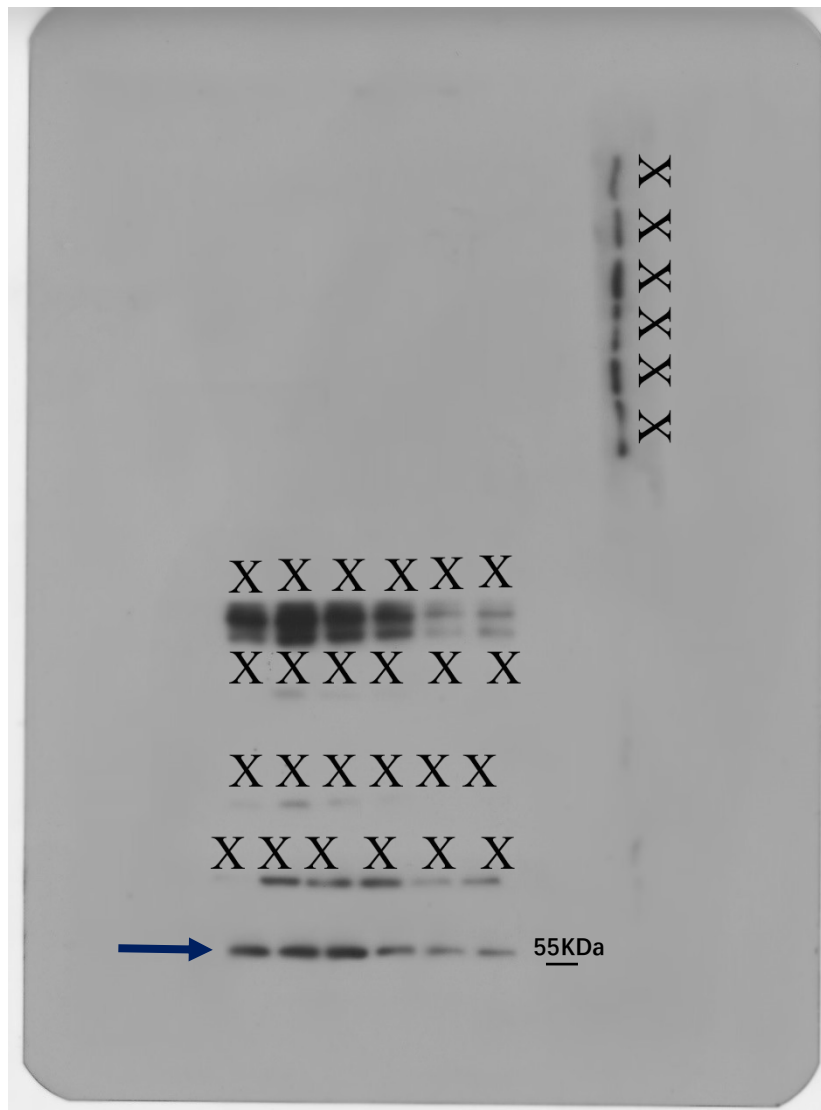

Loading order →

**Identity of experimental samples:**

lane 1-3: Protein samples from the hypothalamus of 10M AAV-CAG-Cre mice 1-3; lane 4-6: Protein samples from the hypothalamus of 10M AAV-CAG-Cre-*Men1*<sup>f/f</sup> mice 1-3.

**Method used to capture the image:**

Chemiluminescence. The bands were captured by developer and fixing solution on medical blue sensitive x-ray film (Baiyun, China), then the bands on the blots were scanned and analyzed with ImageJ (National Institutes of Health, Bethesda, MD, USA).

**Actin**

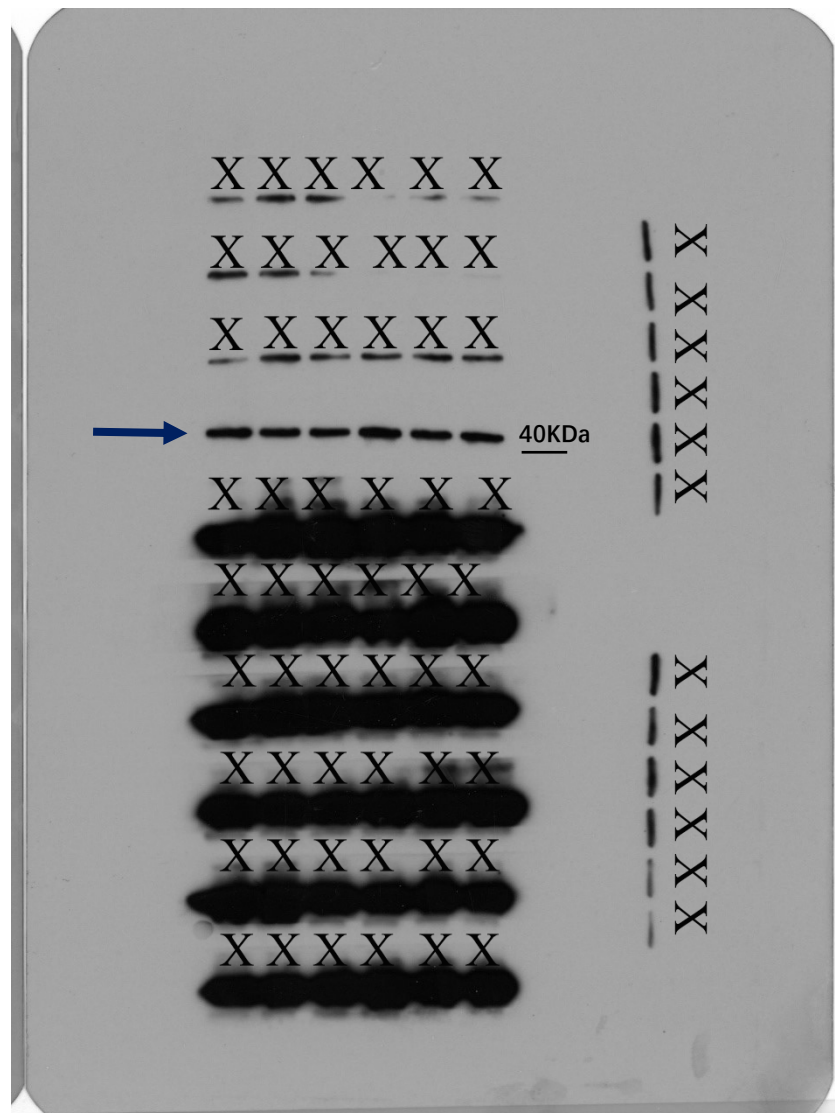

**Loading order** →

**Identity of experimental samples:**

lane 1-3: Protein samples from the hypothalamus of 10M AAV-CAG-Cre mice 1-3; lane 4-6: Protein samples from the hypothalamus of 10M AAV-CAG-Cre-*Men1*<sup>fl/fl</sup> mice 1-3.

**Method used to capture the image:**

Chemiluminescence. The bands were captured by developer and fixing solution on medical blue sensitive x-ray film (Baiyun, China), then the bands on the blots were scanned and analyzed with ImageJ (National Institutes of Health, Bethesda, MD, USA).

**Fig 4L**  
**Menin**

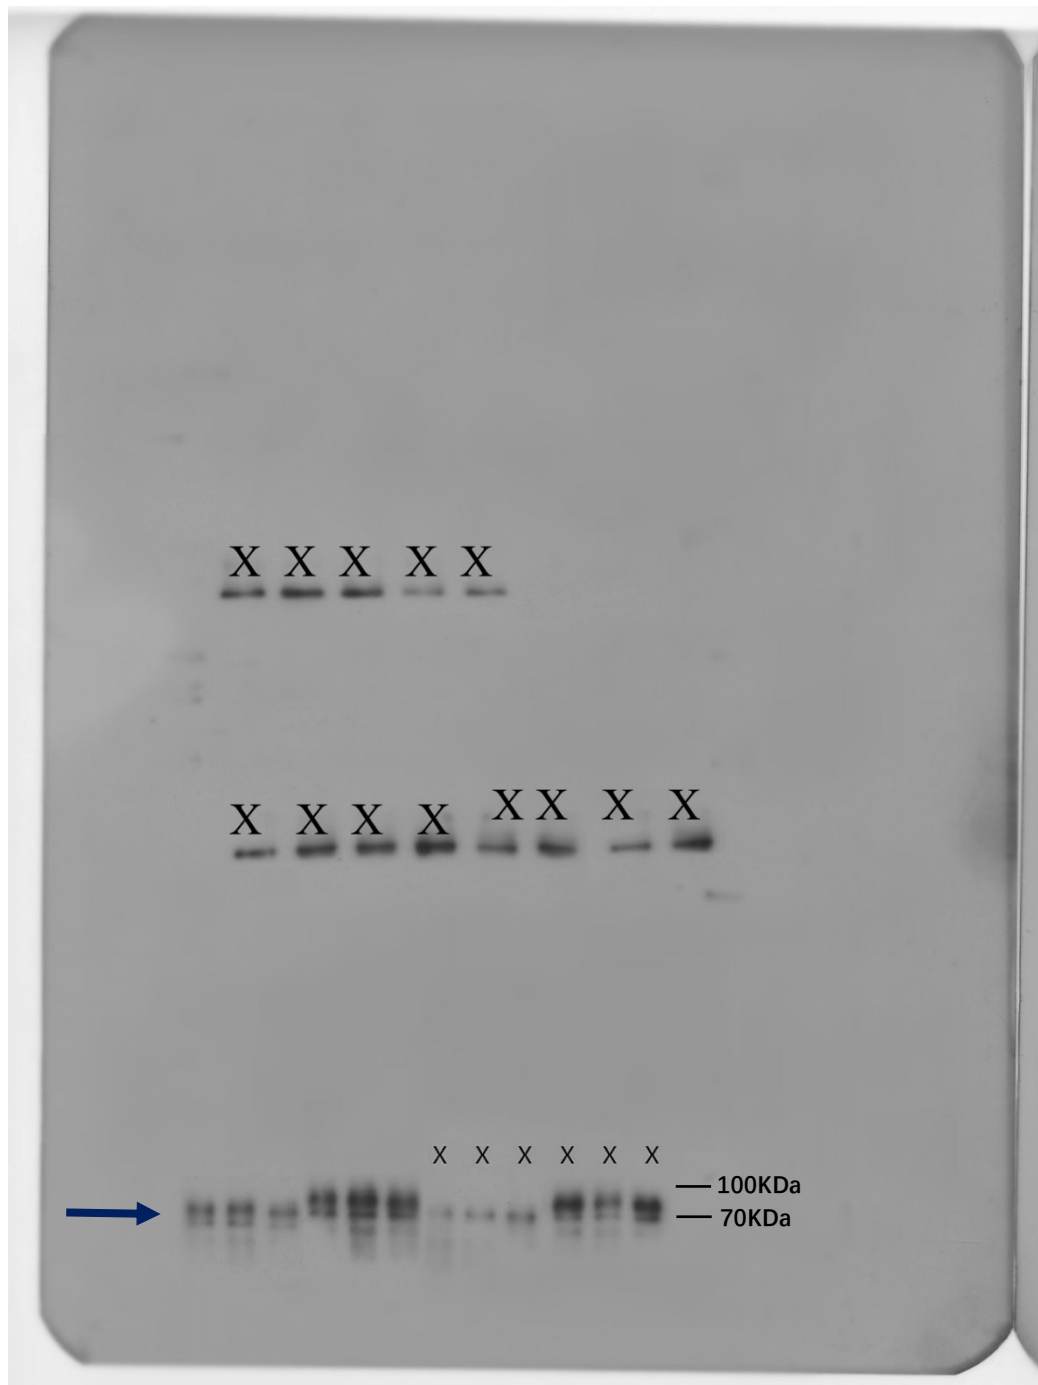

**Loading order** —————>

**Identity of experimental samples:**

lane 1-3: Protein samples from the hypothalamus of 20M AAV-GFP mice 1-3; lane 4-6: Protein samples from the hypothalamus of 20M AAV-Menin-GFP mice 1-3.

**Method used to capture the image:**

Chemiluminescence. The bands were captured by developer and fixing solution on medical blue sensitive x-ray film (Baiyun, China), then the bands on the blots were scanned and analyzed with ImageJ (National Institutes of Health, Bethesda, MD, USA).

## PHGDH

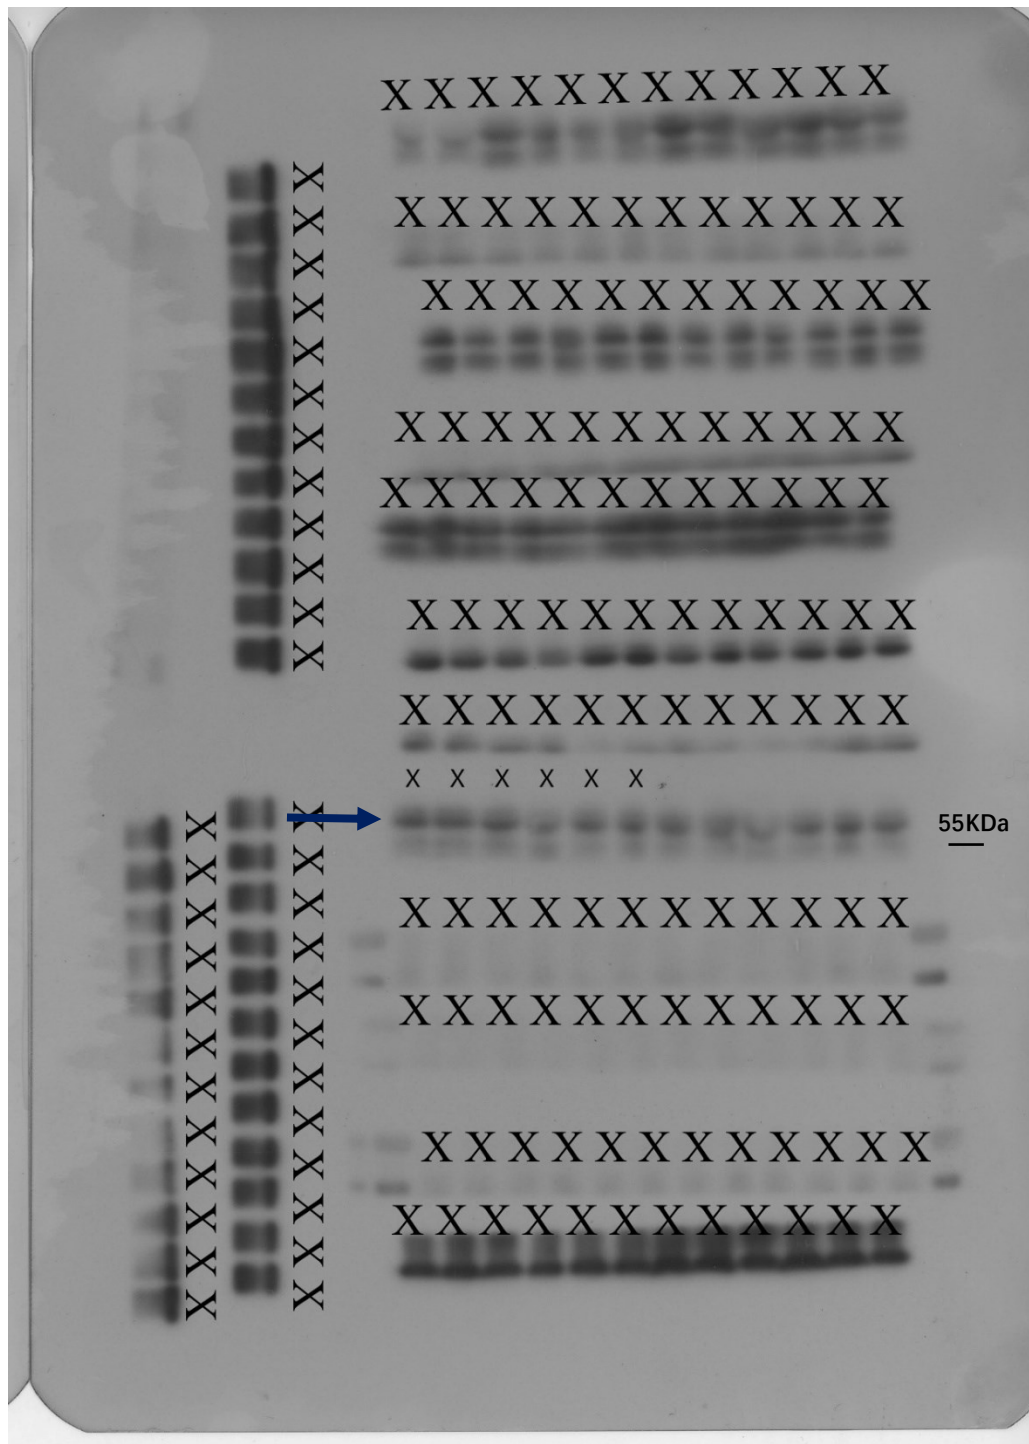

**Loading order** —————>

**Identity of experimental samples:**

lane 7-9: Protein samples from the hypothalamus of 20M AAV-GFP mice 1-3; lane 10-12: Protein samples from the hypothalamus of 20M AAV-Menin-GFP mice 1-3.

**Method used to capture the image:**

Chemiluminescence. The bands were captured by developer and fixing solution on medical blue sensitive x-ray film (Baiyun, China), then the bands on the blots were scanned and analyzed with ImageJ (National Institutes of Health, Bethesda, MD, USA).



## Actin

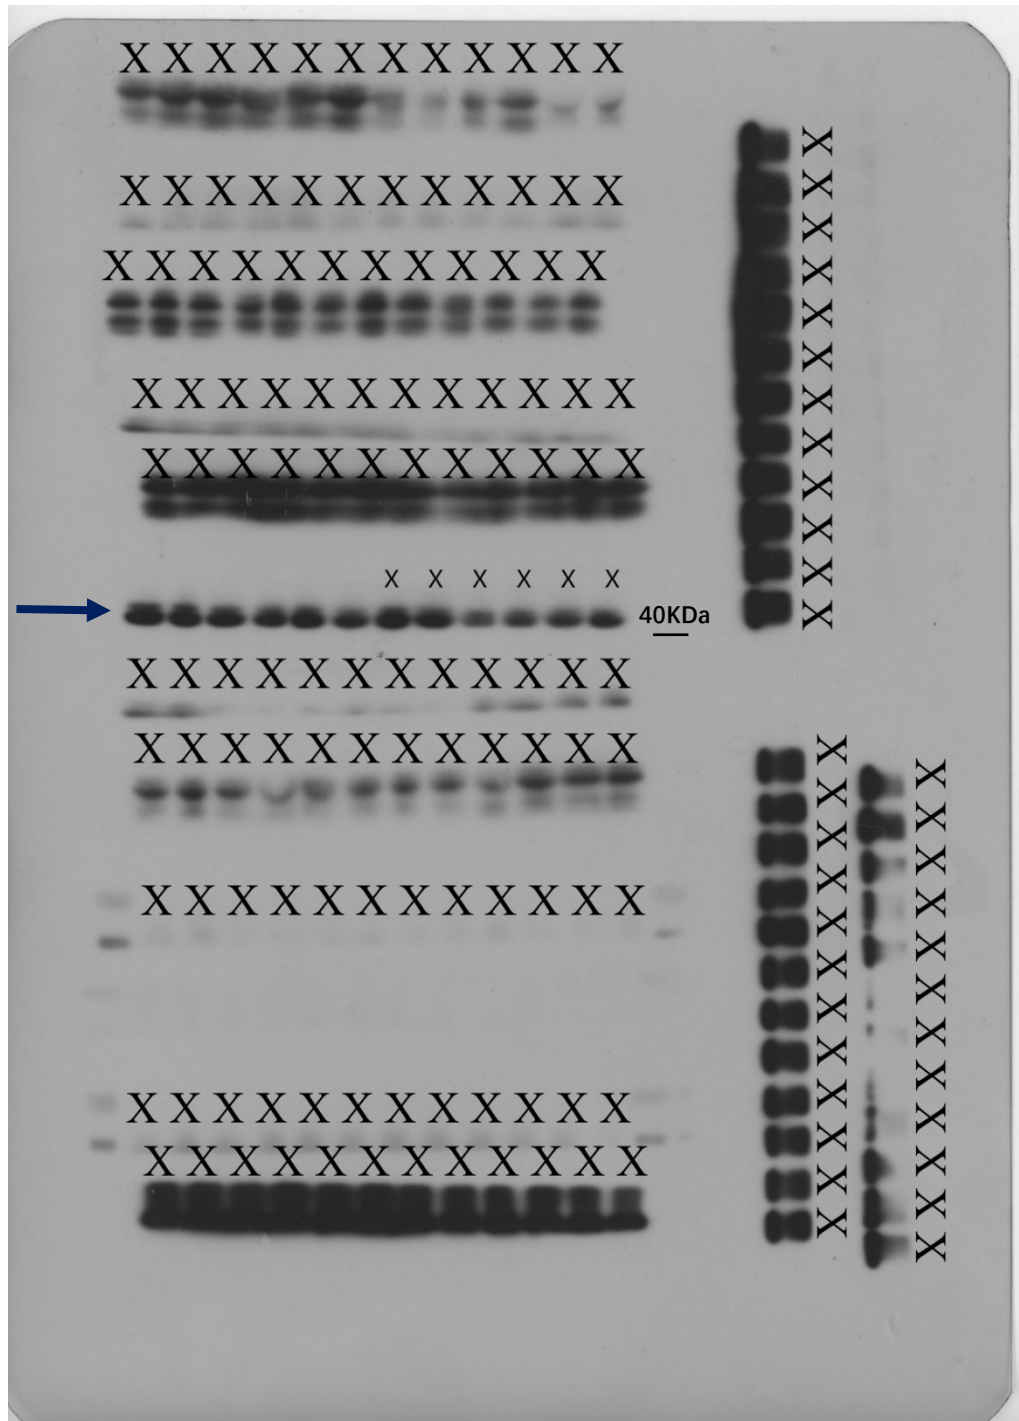

**Loading order** →

### **Identity of experimental samples:**

lane 1-3: Protein samples from the hypothalamus of 20M AAV-GFP mice 1-3; lane 4-6: Protein samples from the hypothalamus of 20M AAV-Menin-GFP mice 1-3.

### **Method used to capture the image:**

Chemiluminescence. The bands were captured by developer and fixing solution on medical blue sensitive x-ray film (Baiyun, China), then the bands on the blots were scanned and analyzed with ImageJ (National Institutes of Health, Bethesda, MD, USA).

SourceData\_Gel\_Fig 5

Fig 5J

IL-1 $\beta$

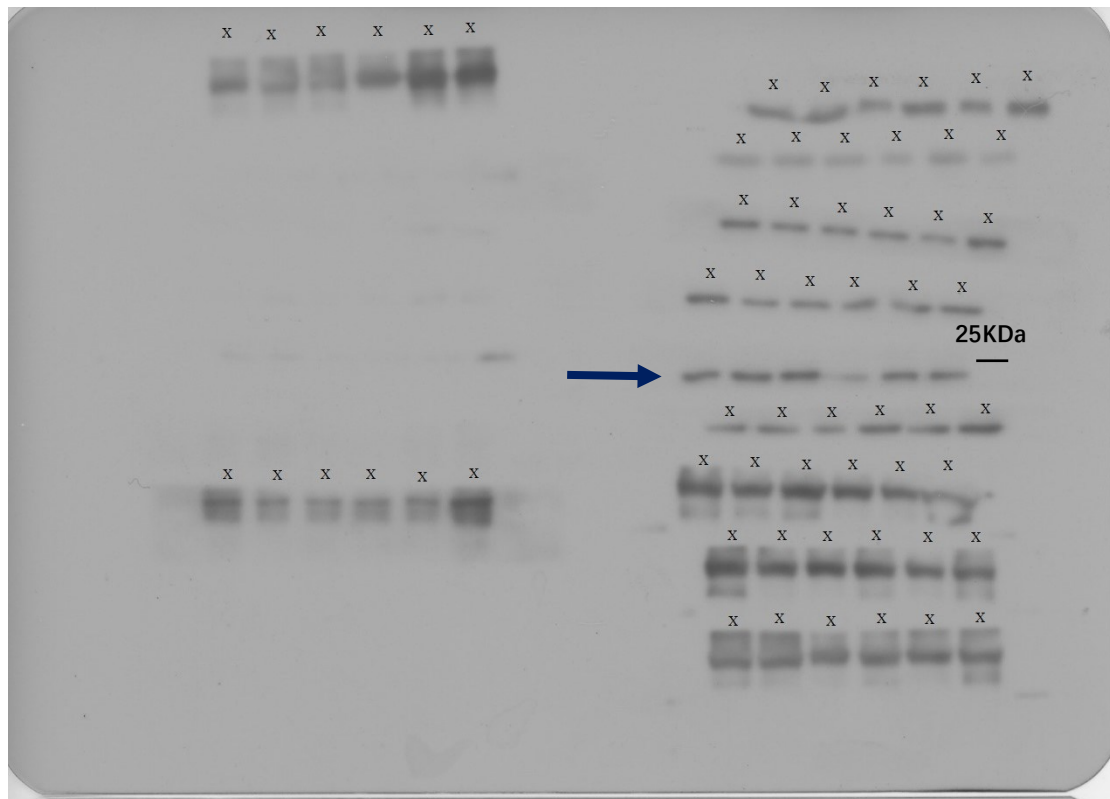

**Loading order** —————>

**Identity of experimental samples:**

lane 1-3: Protein samples from the hypothalamus of 20M AAV-GFP mice 1-3; lane 4-6: Protein samples from the hypothalamus of 20M AAV-Menin-GFP mice 1-3.

**Method used to capture the image:**

Chemiluminescence. The bands were captured by developer and fixing solution on medical blue sensitive x-ray film (Baiyun, China), then the bands on the blots were scanned and analyzed with ImageJ (National Institutes of Health, Bethesda, MD, USA).



## Actin

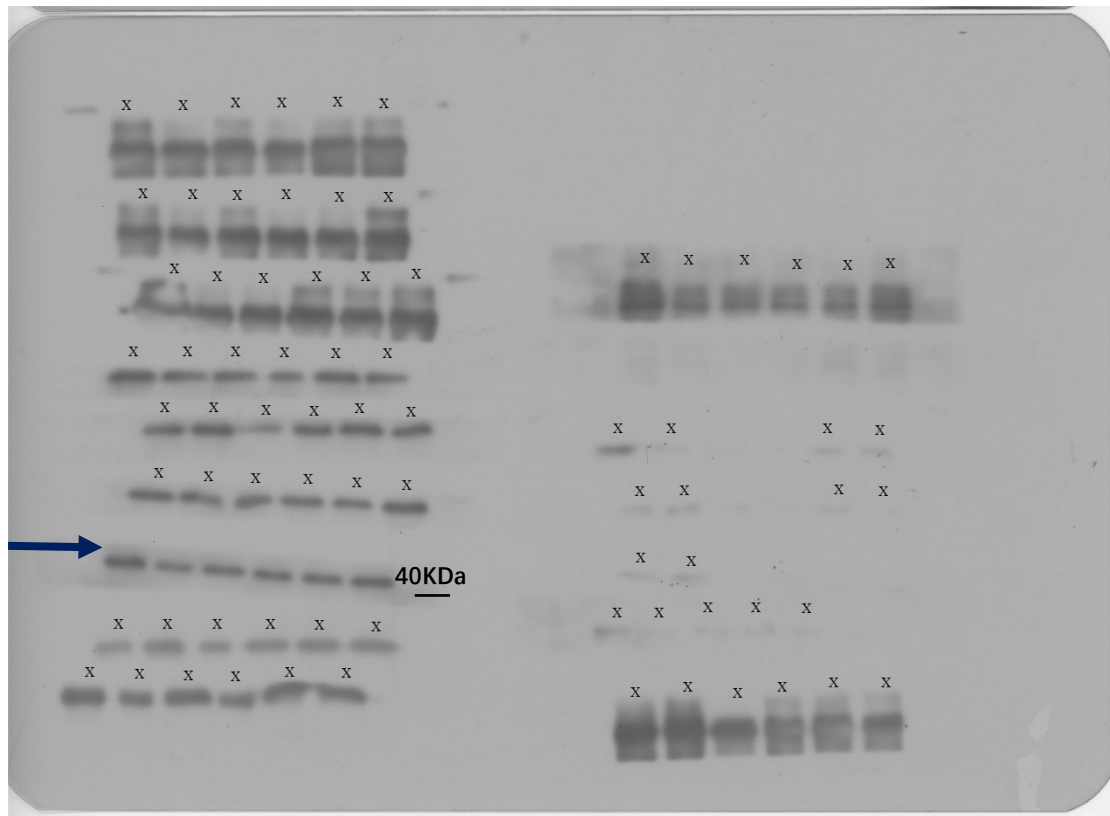

**Loading order** →

**Identity of experimental samples:**

lane 1-3: Protein samples from the hypothalamus of 20M AAV-GFP mice 1-3; lane 4-6: Protein samples from the hypothalamus of 20M AAV-Menin-GFP mice 1-3.

**Method used to capture the image:**

Chemiluminescence. The bands were captured by developer and fixing solution on medical blue sensitive x-ray film (Baiyun, China), then the bands on the blots were scanned and analyzed with ImageJ (National Institutes of Health, Bethesda, MD, USA).

SourceData\_Gel\_S1\_Fig

S1A\_Fig

Menin

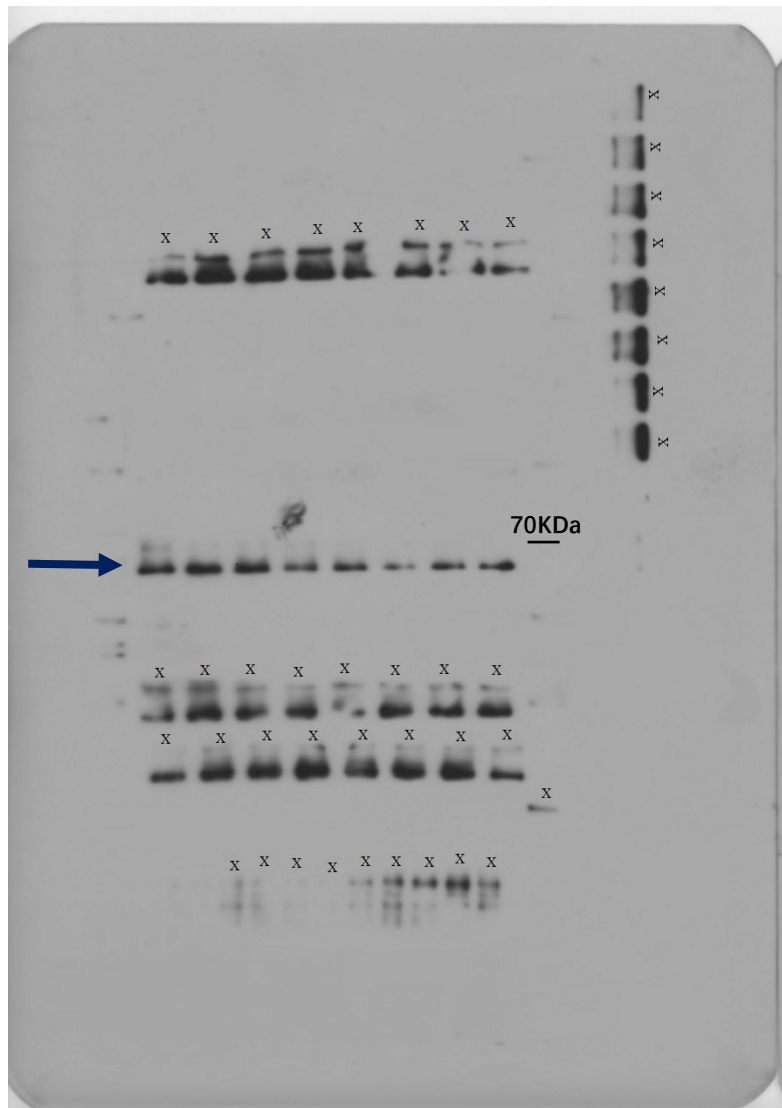

**Loading order** →

**Identity of experimental samples:**

lane 1-4: Protein samples from the hippocampus of young (3M) mice 1-4; lane 5-8: Protein samples from the hippocampus of old (20M) mice 1-4.

**Method used to capture the image:**

Chemiluminescence. The bands were captured by developer and fixing solution on medical blue sensitive x-ray film (Baiyun, China), then the bands on the blots were scanned and analyzed with ImageJ (National Institutes of Health, Bethesda, MD, USA).

## Actin

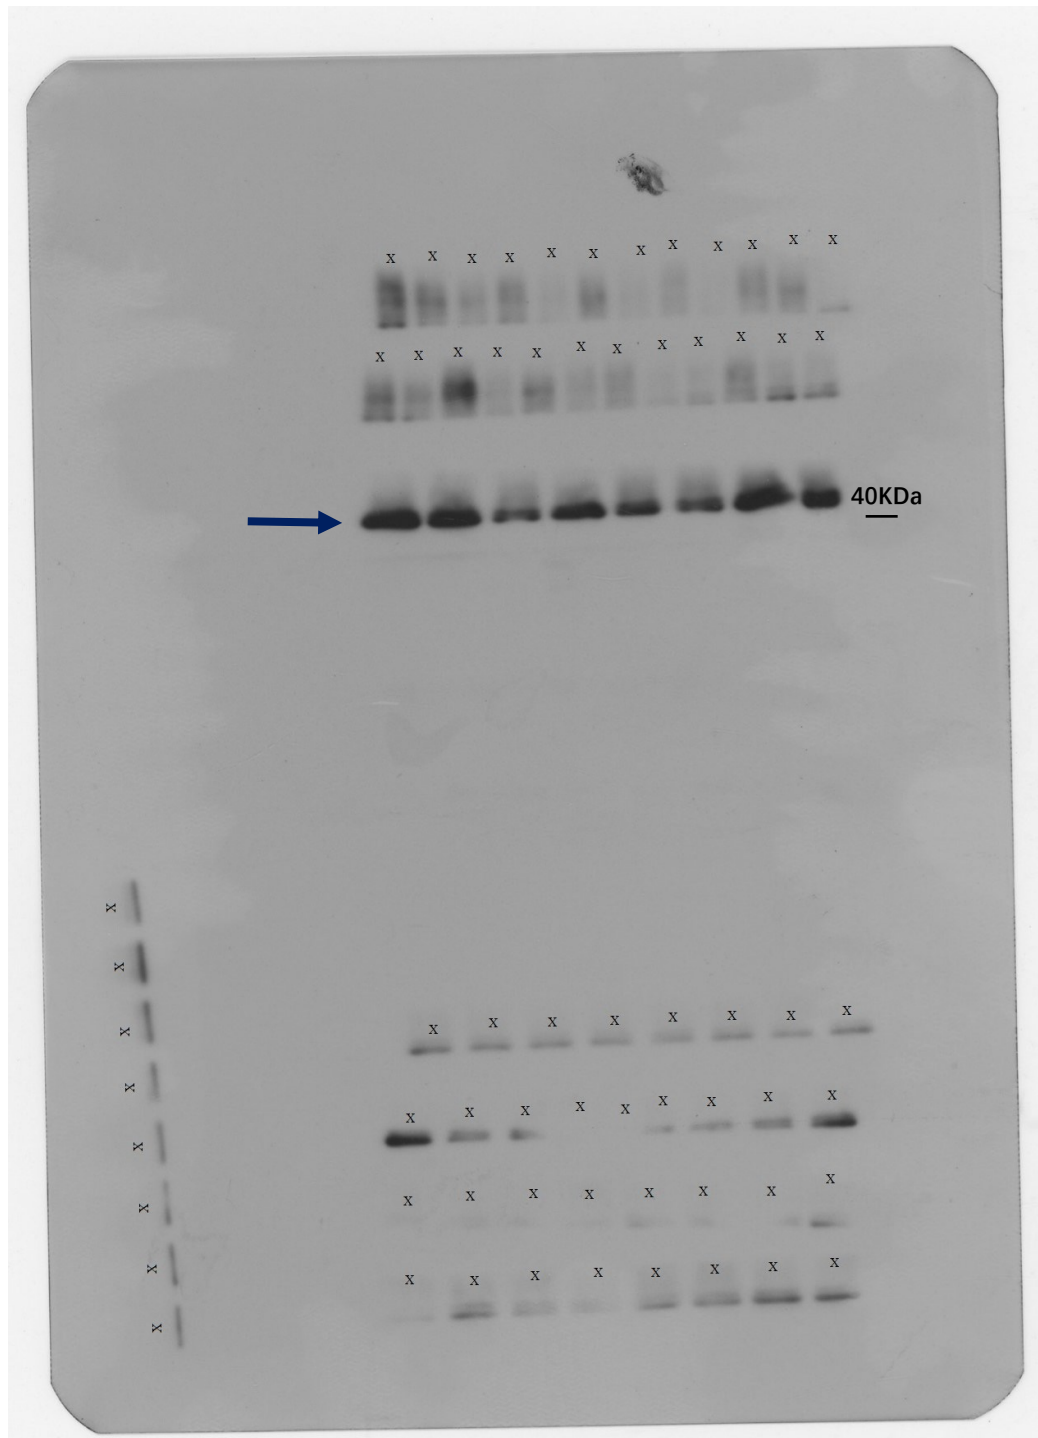

**Loading order** →

**Identity of experimental samples:**

lane 1-4: Protein samples from the hippocampus of young (3M) mice 1-4; lane 5-8: Protein samples from the hippocampus of old (20M) mice 1-4.

**Method used to capture the image:**

Chemiluminescence. The bands were captured by developer and fixing solution on medical blue sensitive x-ray film (Baiyun, China), then the bands on the blots were scanned and analyzed with ImageJ (National Institutes of Health, Bethesda, MD, USA).

**S1C\_Fig**  
**Menin**

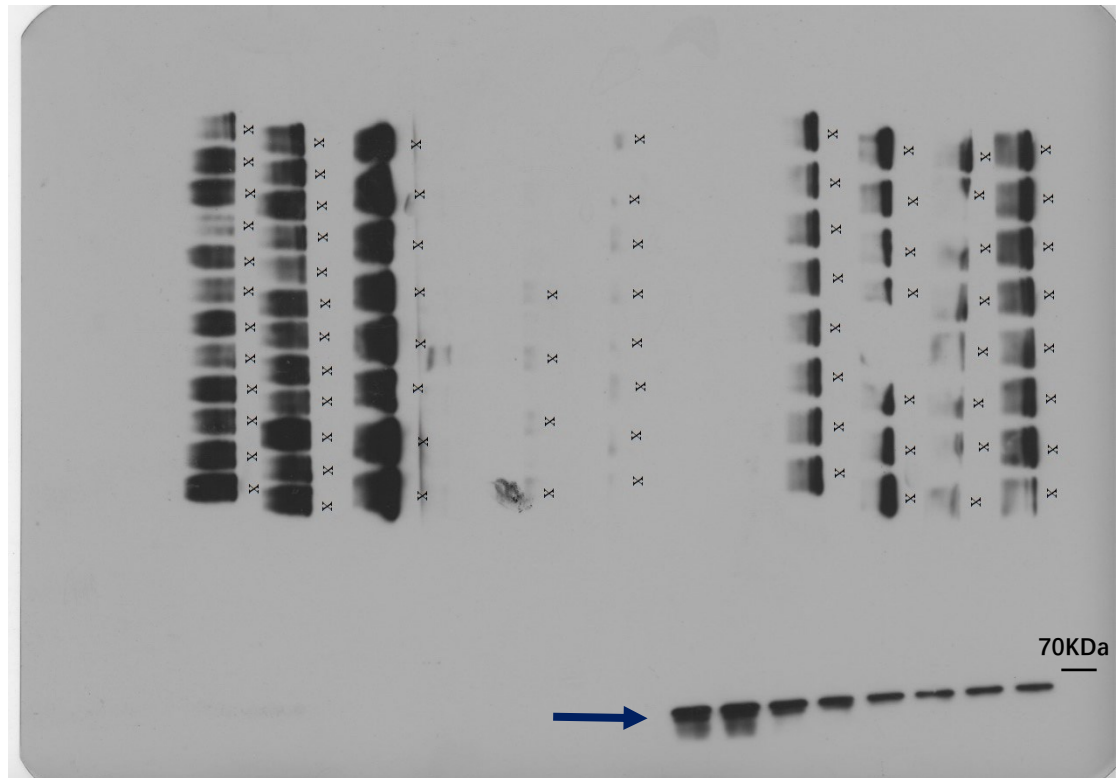

**Loading order** →

**Identity of experimental samples:**

lane 1-4: Protein samples from the striatum of young (3M) mice 1-4; lane 5-8: Protein samples from the striatum of old (20M) mice 1-4.

**Method used to capture the image:**

Chemiluminescence. The bands were captured by developer and fixing solution on medical blue sensitive x-ray film (Baiyun, China), then the bands on the blots were scanned and analyzed with ImageJ (National Institutes of Health, Bethesda, MD, USA).

## Actin

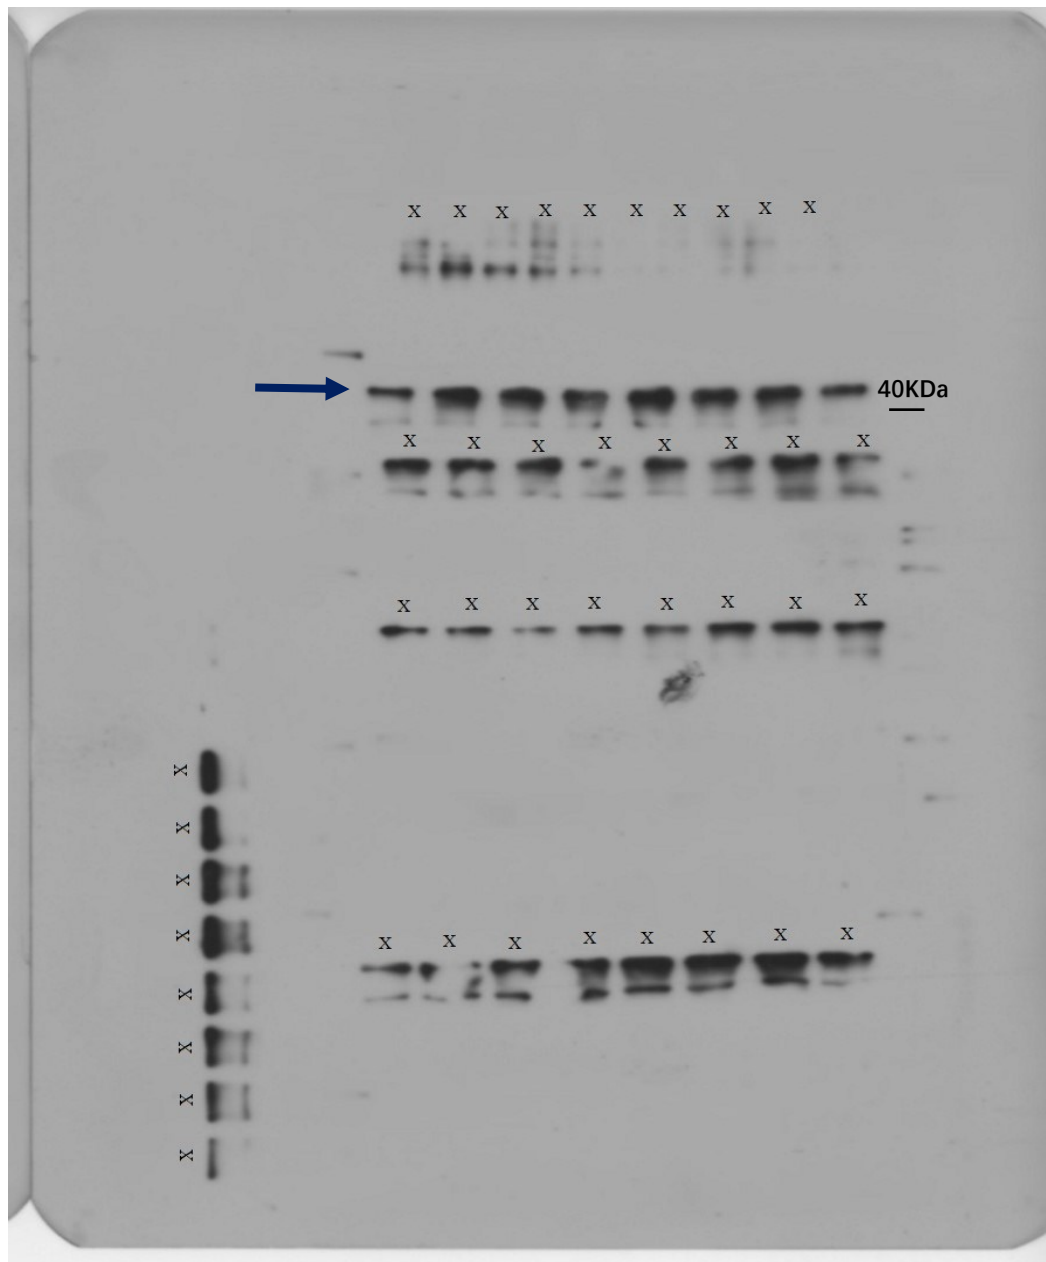

**Loading order** →

### **Identity of experimental samples:**

lane 1-4: Protein samples from the striatum of young (3M) mice 1-4; lane 5-8: Protein samples from the striatum of old (20M) mice 1-4.

### **Method used to capture the image:**

Chemiluminescence. The bands were captured by developer and fixing solution on medical blue sensitive x-ray film (Baiyun, China), then the bands on the blots were scanned and analyzed with ImageJ (National Institutes of Health, Bethesda, MD, USA).

**S1E\_Fig**  
**Menin**

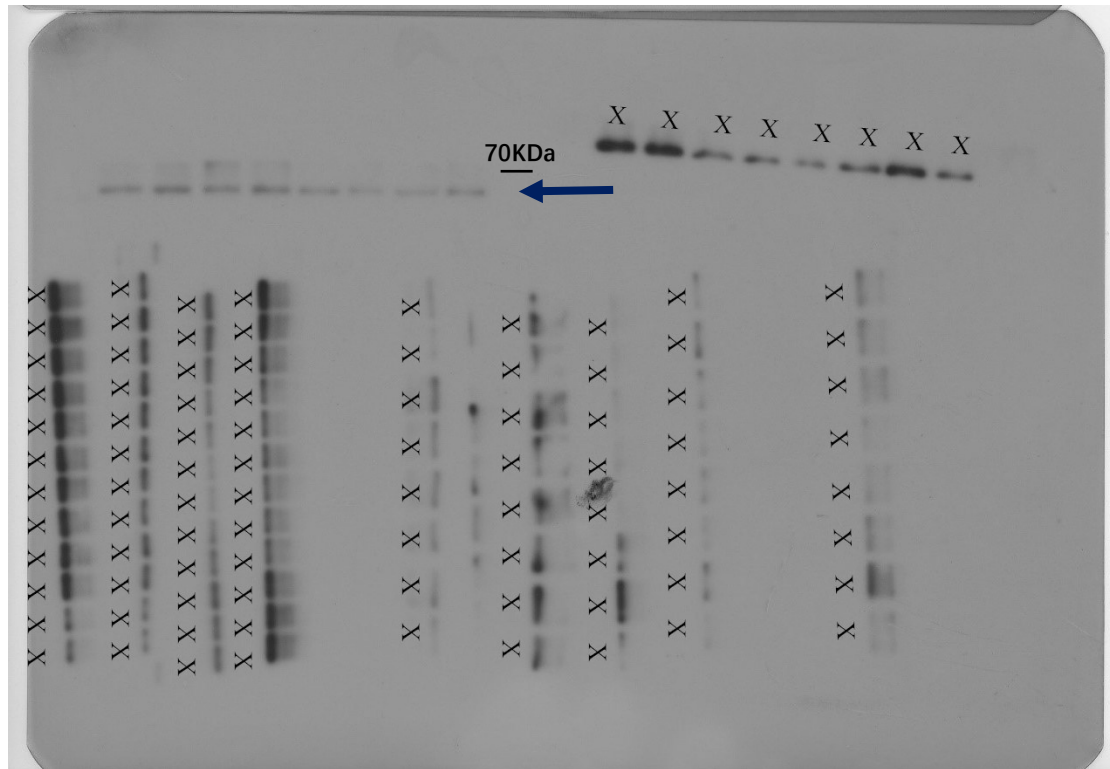

**Loading order** →

**Identity of experimental samples:**

lane 1-4: Protein samples from the prefrontal cortex of young (3M) mice 1-4; lane 5-8: Protein samples from the prefrontal cortex of old (20M) mice 1-4.

**Method used to capture the image:**

Chemiluminescence. The bands were captured by developer and fixing solution on medical blue sensitive x-ray film (Baiyun, China), then the bands on the blots were scanned and analyzed with ImageJ (National Institutes of Health, Bethesda, MD, USA).

## Actin

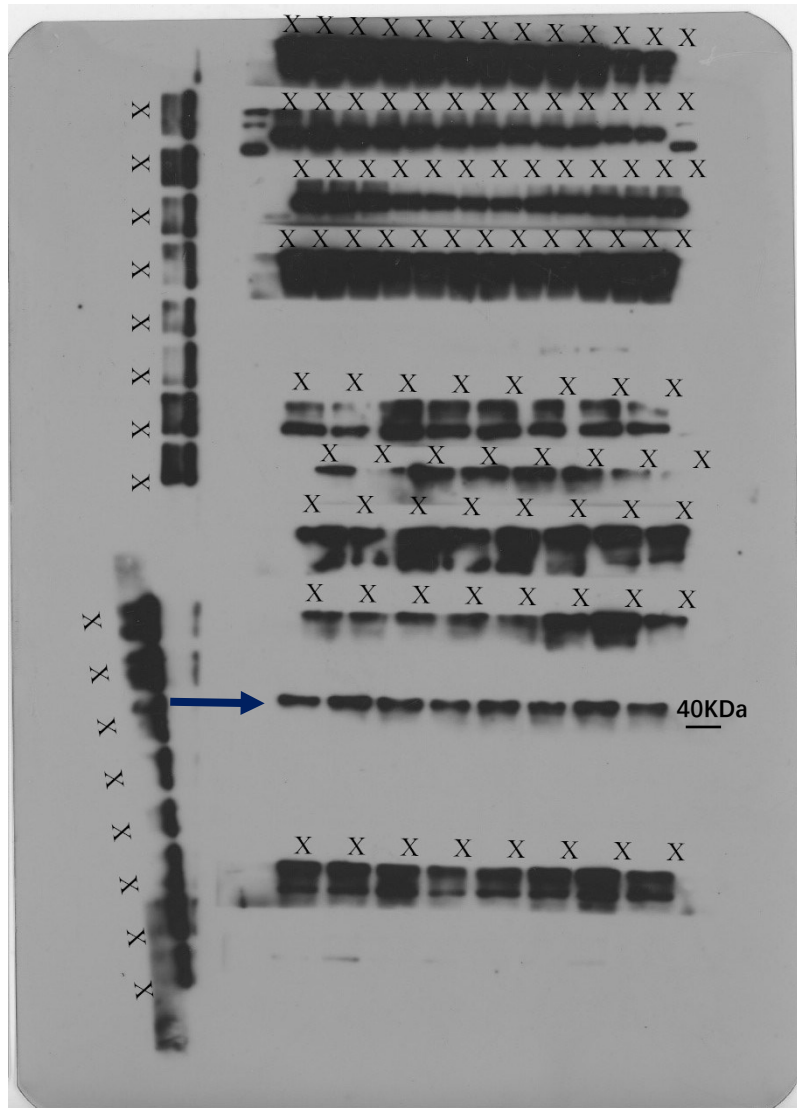

**Loading order** →

### **Identity of experimental samples:**

lane 1-4: Protein samples from the prefrontal cortex of young (3M) mice 1-4; lane 5-8: Protein samples from the prefrontal cortex of old (20M) mice 1-4.

### **Method used to capture the image:**

Chemiluminescence. The bands were captured by developer and fixing solution on medical blue sensitive x-ray film (Baiyun, China), then the bands on the blots were scanned and analyzed with ImageJ (National Institutes of Health, Bethesda, MD, USA).



**S1G\_Fig**  
**Menin**

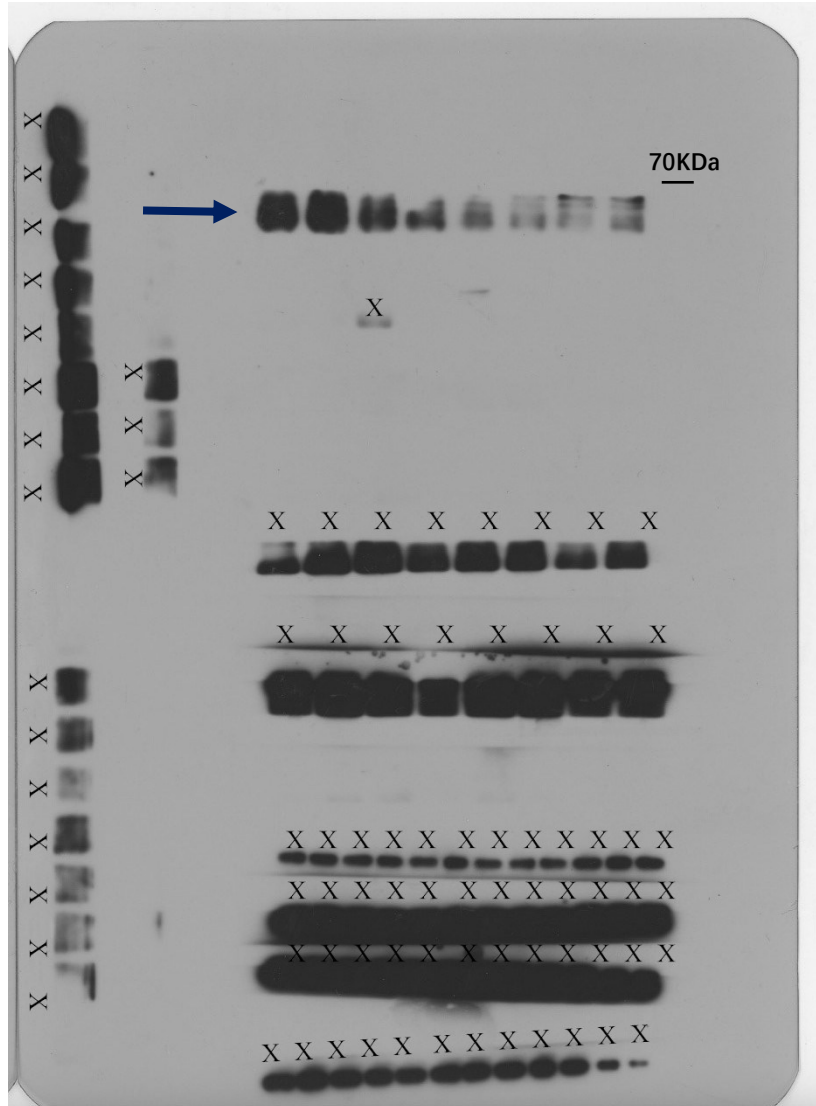

**Loading order** →

**Identity of experimental samples:**

lane 1-4: Protein samples from the motor cortex of young (3M) mice 1-4; lane 5-8: Protein samples from the motor cortex of old (20M) mice 1-4.

**Method used to capture the image:**

Chemiluminescence. The bands were captured by developer and fixing solution on medical blue sensitive x-ray film (Baiyun, China), then the bands on the blots were scanned and analyzed with ImageJ (National Institutes of Health, Bethesda, MD, USA).

## Actin

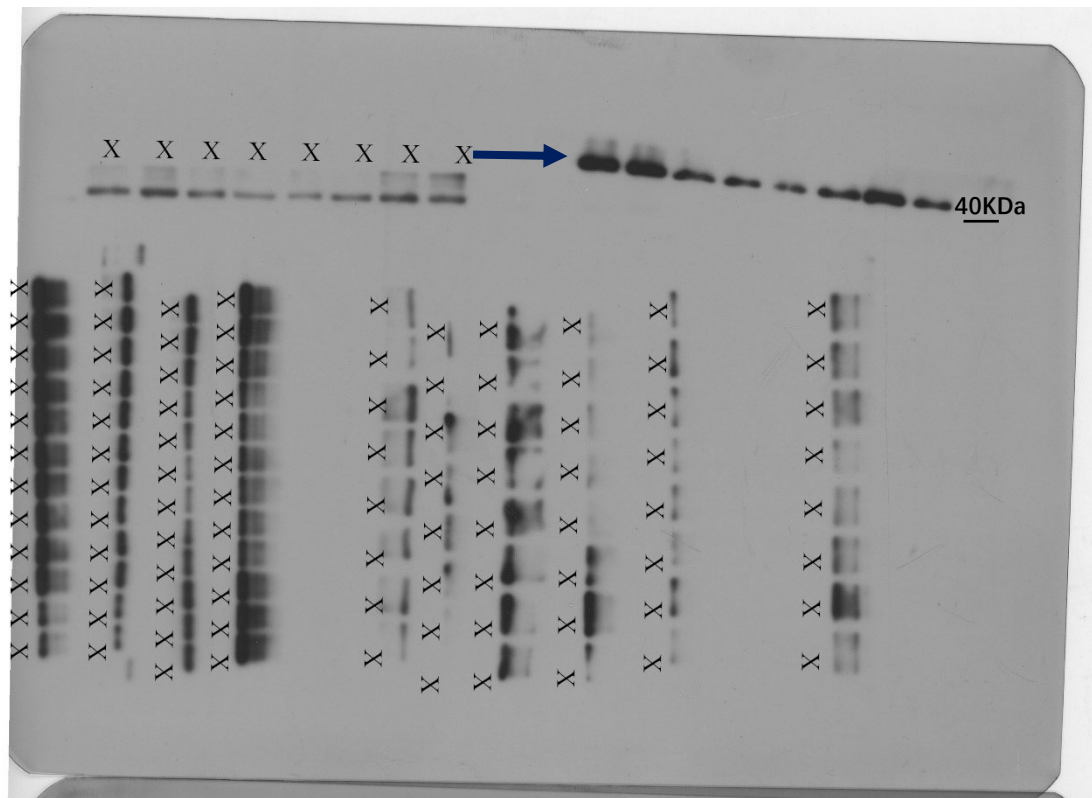

**Loading order** →

### **Identity of experimental samples:**

lane 1-4: Protein samples from the motor cortex of young (3M) mice 1-4; lane 5-8: Protein samples from the motor cortex of old (20M) mice 1-4.

### **Method used to capture the image:**

Chemiluminescence. The bands were captured by developer and fixing solution on medical blue sensitive x-ray film (Baiyun, China), then the bands on the blots were scanned and analyzed with ImageJ (National Institutes of Health, Bethesda, MD, USA).

**S1I\_Fig**  
**Menin**

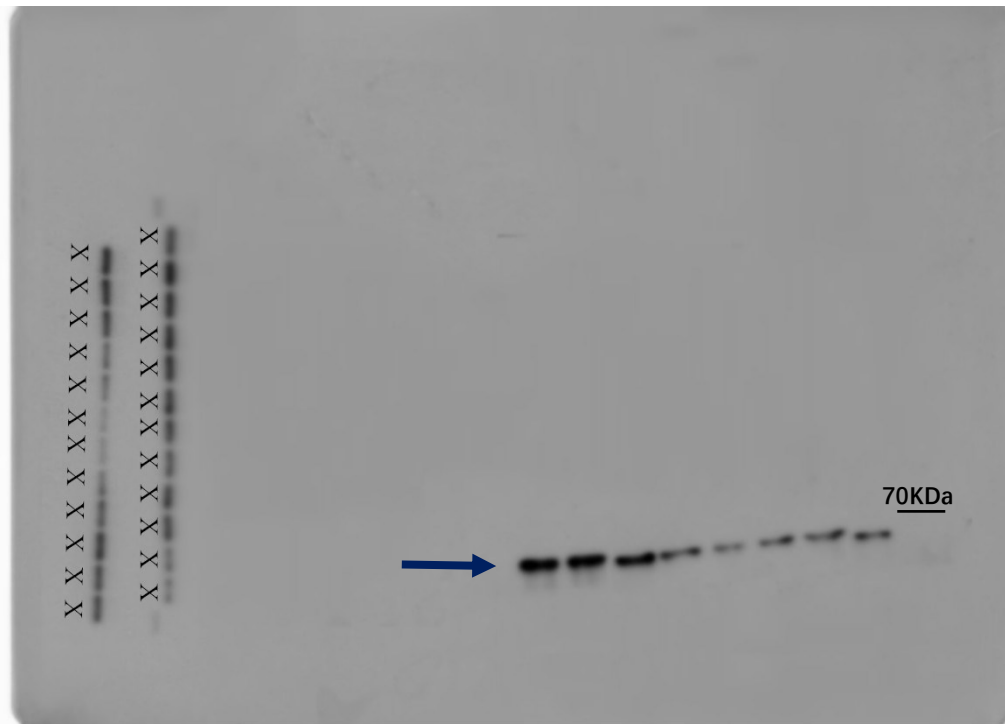

**Loading order** —————>

**Identity of experimental samples:**

lane 1-4: Protein samples from the visual cortex of young (3M) mice 1-4; lane 5-8: Protein samples from the visual cortex of old (20M) mice 1-4.

**Method used to capture the image:**

Chemiluminescence. The bands were captured by developer and fixing solution on medical blue sensitive x-ray film (Baiyun, China), then the bands on the blots were scanned and analyzed with ImageJ (National Institutes of Health, Bethesda, MD, USA).

## Actin

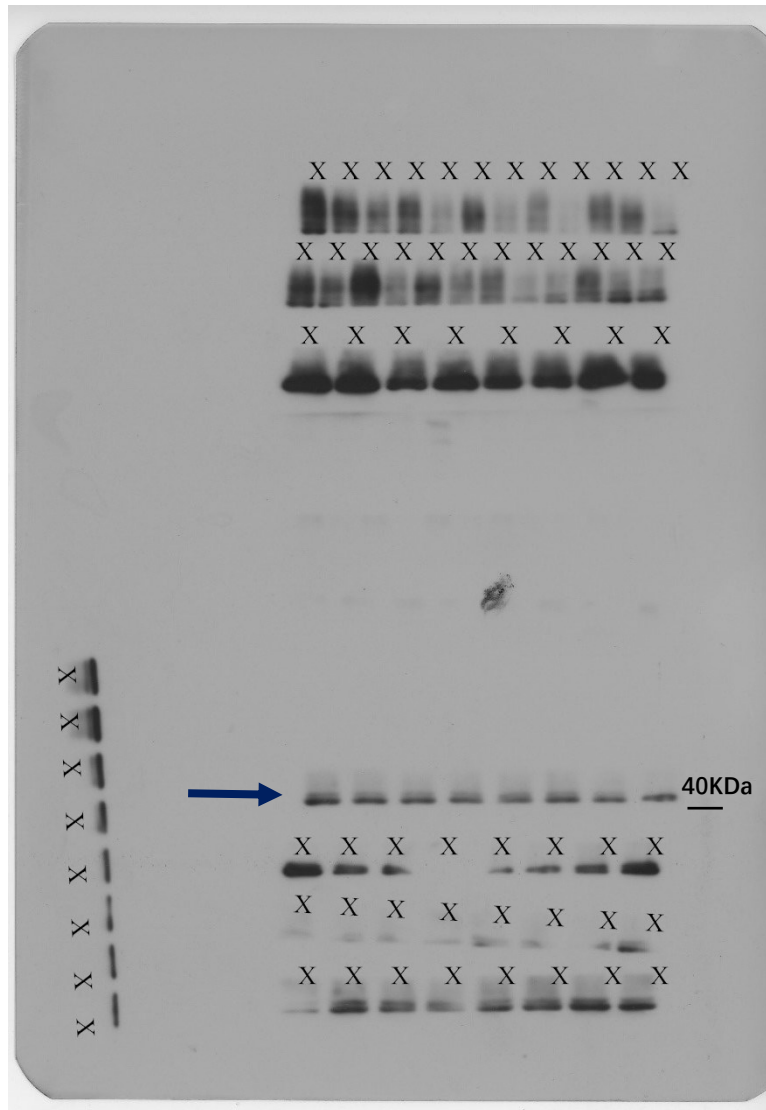

**Loading order** →

### **Identity of experimental samples:**

lane 1-4: Protein samples from the visual cortex of young (3M) mice 1-4; lane 5-8: Protein samples from the visual cortex of old (20M) mice 1-4.

### **Method used to capture the image:**

Chemiluminescence. The bands were captured by developer and fixing solution on medical blue sensitive x-ray film (Baiyun, China), then the bands on the blots were scanned and analyzed with ImageJ (National Institutes of Health, Bethesda, MD, USA).

**S1K\_Fig**  
**Menin**

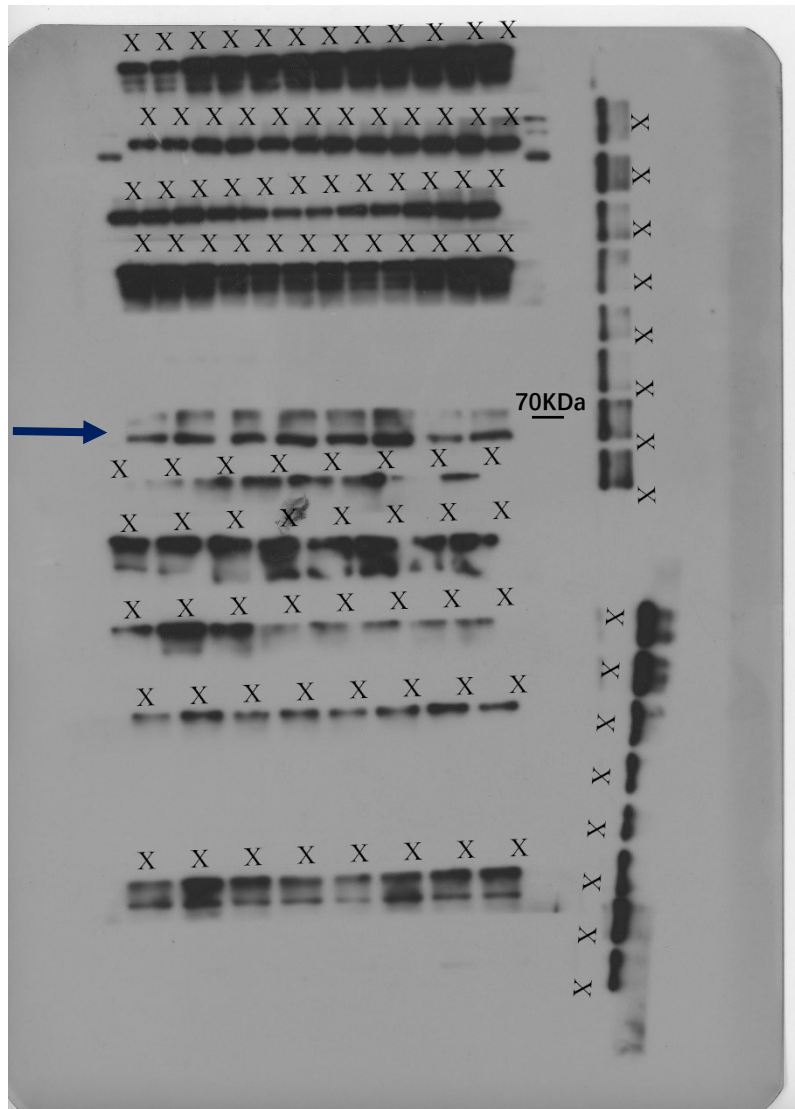

**Loading order** →

**Identity of experimental samples:**

lane 1-4: Protein samples from the cerebellum of young (3M) mice 1-4; lane 5-8: Protein samples from the cerebellum of old (20M) mice 1-4.

**Method used to capture the image:**

Chemiluminescence. The bands were captured by developer and fixing solution on medical blue sensitive x-ray film (Baiyun, China), then the bands on the blots were scanned and analyzed with ImageJ (National Institutes of Health, Bethesda, MD, USA).

## Actin

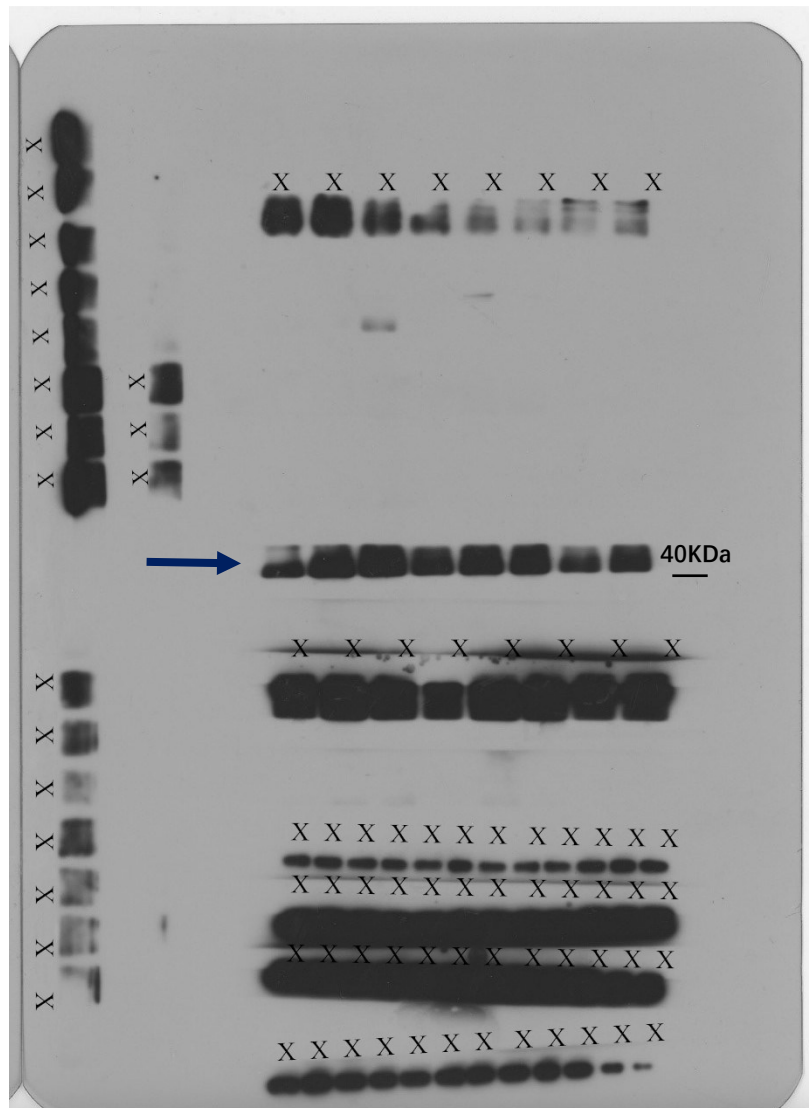

**Loading order** →

### **Identity of experimental samples:**

lane 1-4: Protein samples from the cerebellum of young (3M) mice 1-4; lane 5-8: Protein samples from the cerebellum of old (20M) mice 1-4.

### **Method used to capture the image:**

Chemiluminescence. The bands were captured by developer and fixing solution on medical blue sensitive x-ray film (Baiyun, China), then the bands on the blots were scanned and analyzed with ImageJ (National Institutes of Health, Bethesda, MD, USA).

**S1S\_Fig**  
**Menin**

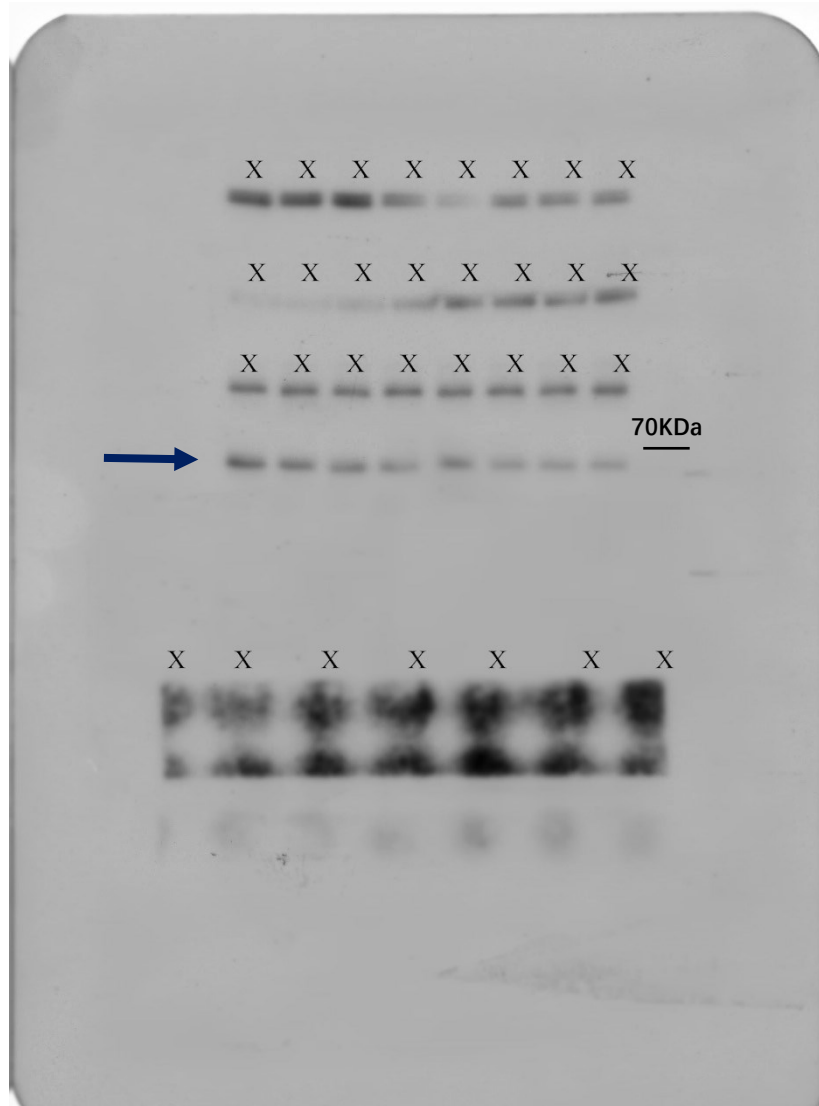

**Loading order** →

**Identity of experimental samples:**

lane 1-2: Protein samples from the hypothalamus of 3M wildtype mice 1-2; lane 3-4: Protein samples from the hypothalamus of 10M wildtype mice 1-2; lane 5-6: Protein samples from the hypothalamus of 16M wildtype mice 1-2; lane 7-8: Protein samples from the hypothalamus of 20M wildtype mice 1-2.

**Method used to capture the image:**

Chemiluminescence. The bands were captured by developer and fixing solution on medical blue sensitive x-ray film (Baiyun, China), then the bands on the blots were scanned and analyzed with ImageJ (National Institutes of Health, Bethesda, MD, USA).



## Actin

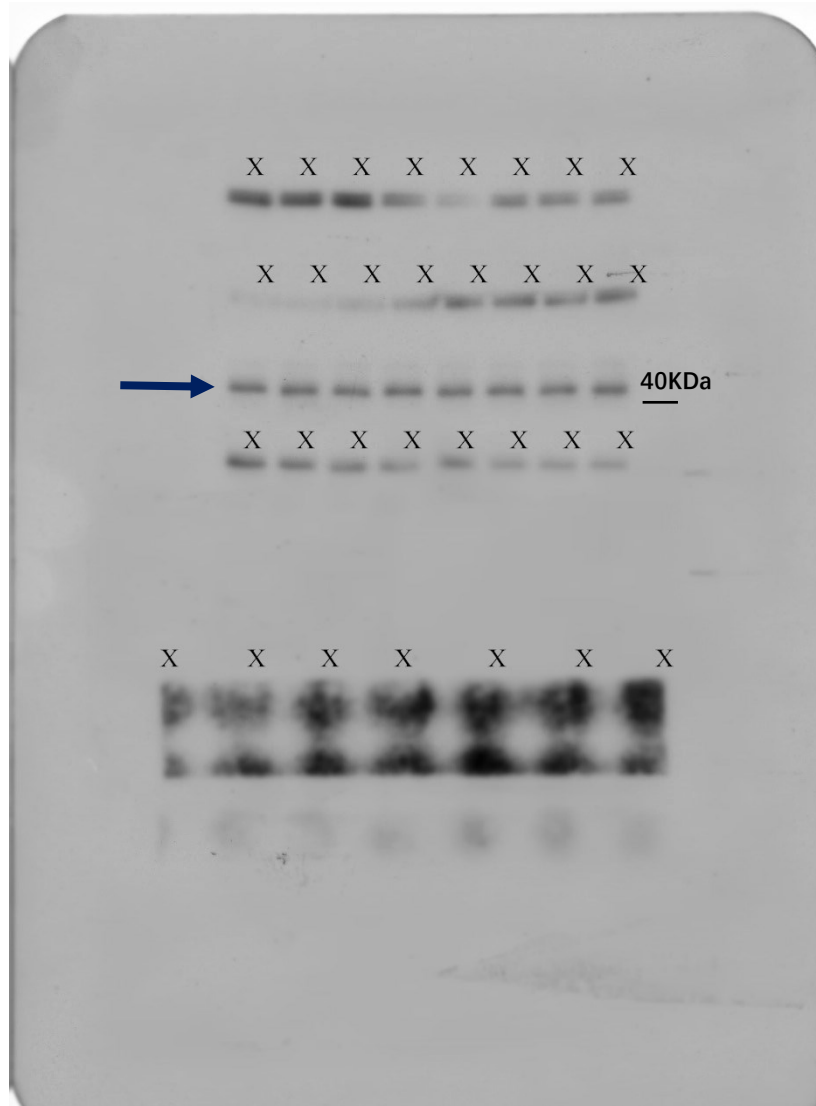

**Loading order** →

### **Identity of experimental samples:**

lane 1-2: Protein samples from the hypothalamus of 3M wildtype mice 1-2; lane 3-4: Protein samples from the hypothalamus of 10M wildtype mice 1-2; lane 5-6: Protein samples from the hypothalamus of 16M wildtype mice 1-2; lane 7-8: Protein samples from the hypothalamus of 20M wildtype mice 1-2.

### **Method used to capture the image:**

Chemiluminescence. The bands were captured by developer and fixing solution on medical blue sensitive x-ray film (Baiyun, China), then the bands on the blots were scanned and analyzed with ImageJ (National Institutes of Health, Bethesda, MD, USA).

## SourceData\_Gel\_S4\_Fig

### S4A\_Fig

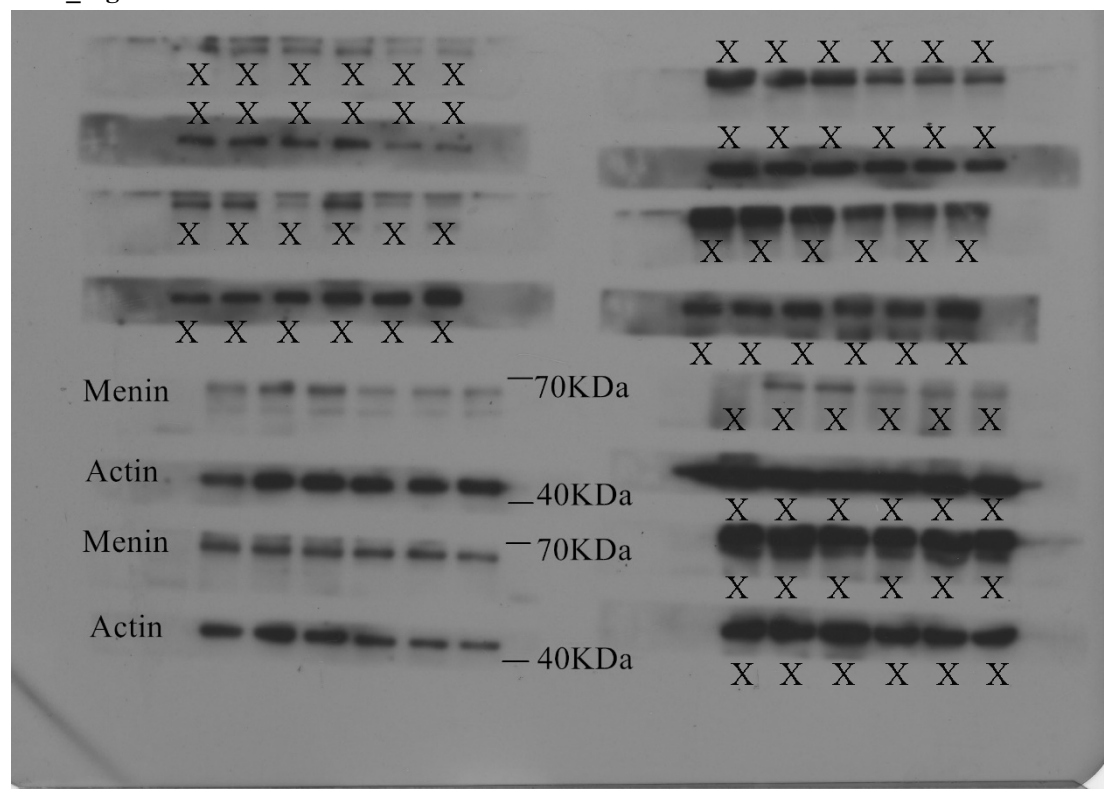

**Loading order** →

#### **Identity of experimental samples:**

lane 1-3: Protein samples from the adrenal gland of 6M male wildtype mice 1-3; lane 4-6: Protein samples from the adrenal gland of 6M male ScKO mice 1-3; lane 1-3: Protein samples from the adrenal gland of 6M male wildtype mice 1-3; lane 4-6: Protein samples from the adrenal gland of 6M male ScKO mice 1-3;

lane 1-3: Protein samples from the adrenal gland of 6M female wildtype mice 1-3; lane 4-6: Protein samples from the adrenal gland of 6M female ScKO mice 1-3;

lane 1-3: Protein samples from the adrenal gland of 6M female wildtype mice 1-3; lane 4-6: Protein samples from the adrenal gland of 6M female ScKO mice 1-3;

#### **Method used to capture the image:**

Chemiluminescence. The bands were captured by developer and fixing solution on medical blue sensitive x-ray film (Baiyun, China), then the bands on the blots were scanned and analyzed with ImageJ (National Institutes of Health, Bethesda, MD, USA).

S4C\_Fig  
Menin

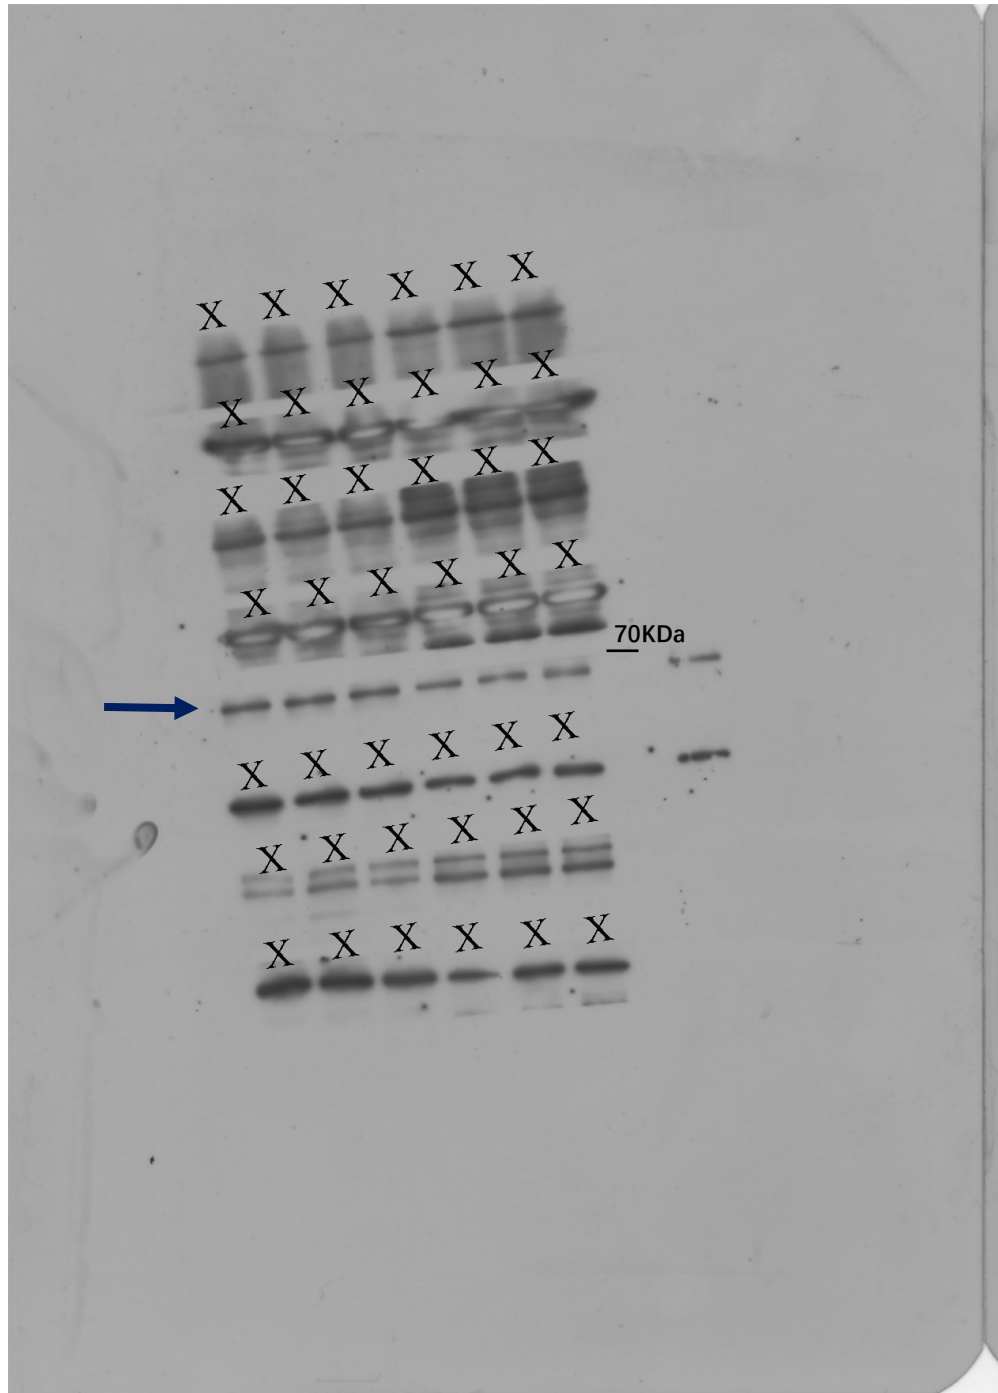

**Loading order** —————>

**Identity of experimental samples:**

lane 1-3: Protein samples from the pituitary of 6M male wildtype mice 1-3; lane 4-6: Protein samples from the pituitary of 6M male ScKO mice 1-3;

**Method used to capture the image:**

Chemiluminescence. The bands were captured by developer and fixing solution on medical blue sensitive x-ray film (Baiyun, China), then the bands on the blots were scanned and analyzed with ImageJ (National Institutes of Health, Bethesda, MD, USA).

## Actin

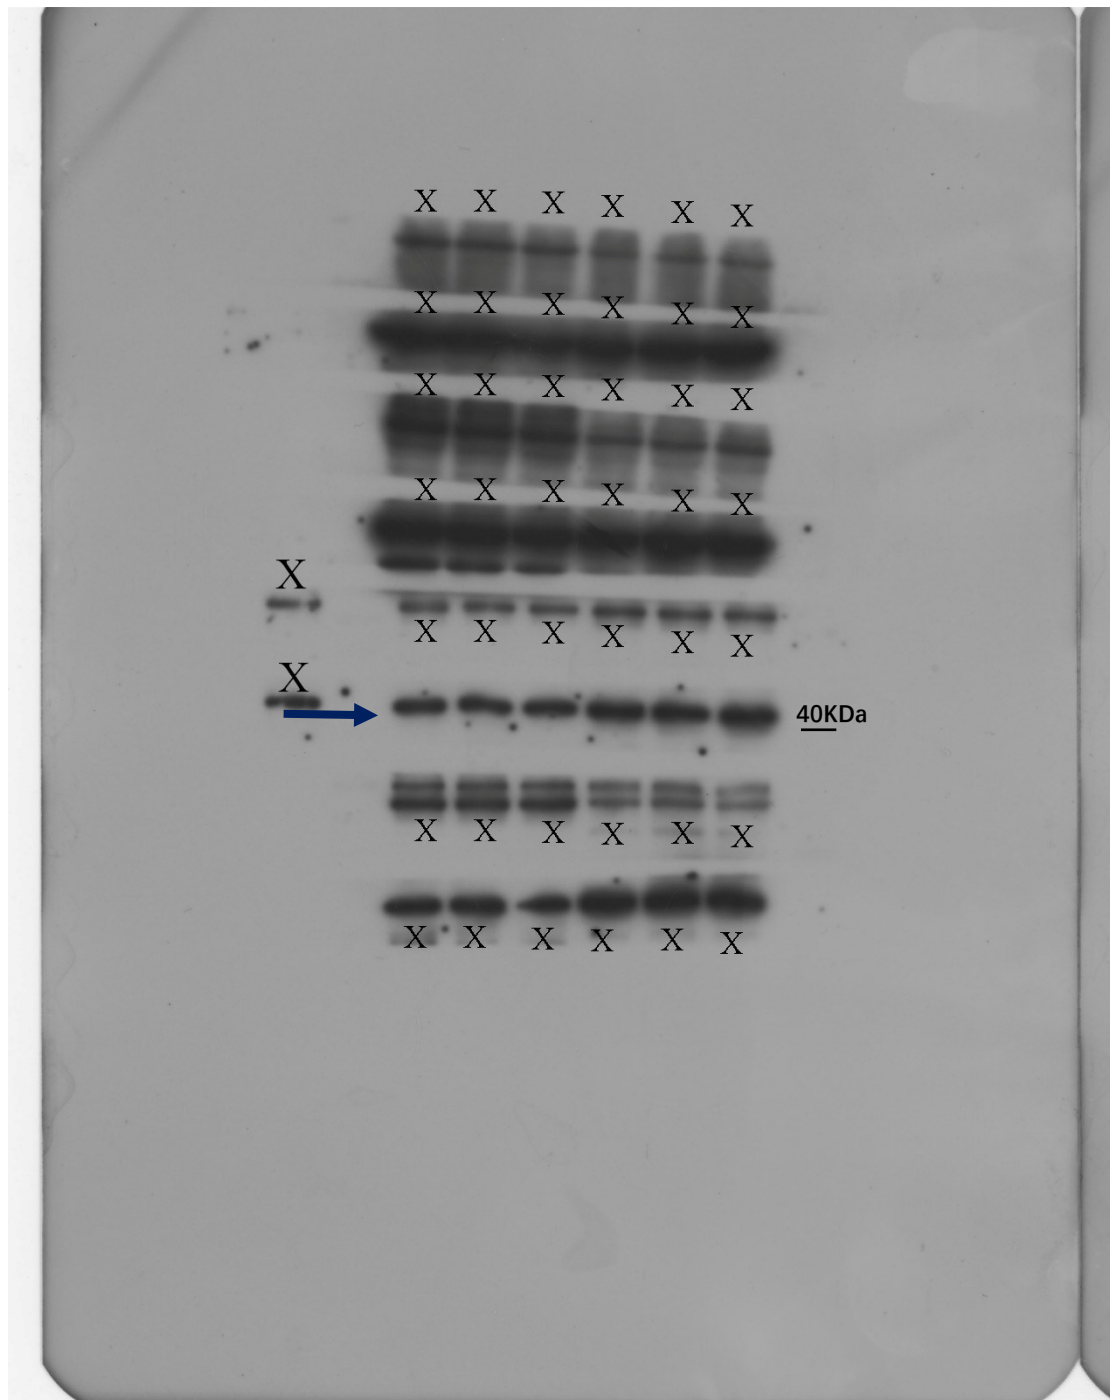

**Loading order** →

### **Identity of experimental samples:**

lane 1-3: Protein samples from the pituitary of 6M male wildtype mice 1-3; lane 4-6: Protein samples from the pituitary of 6M male ScKO mice 1-3.

### **Method used to capture the image:**

Chemiluminescence. The bands were captured by developer and fixing solution on medical blue sensitive x-ray film (Baiyun, China), then the bands on the blots were scanned and analyzed with ImageJ (National Institutes of Health, Bethesda, MD, USA).

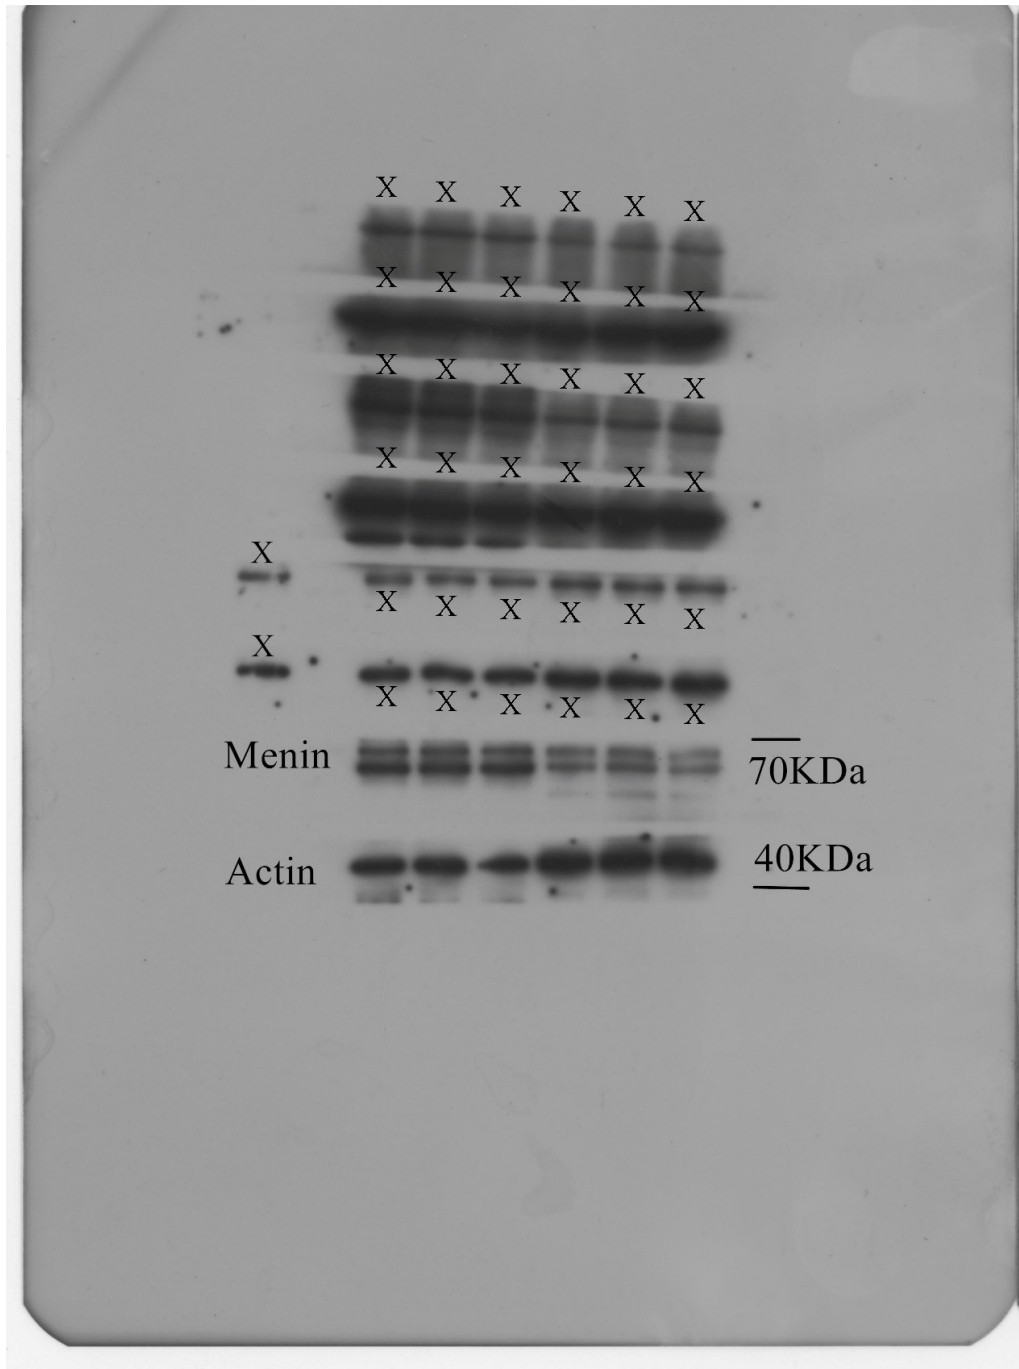

**Loading order** →

**Identity of experimental samples:**

lane 1-3: Protein samples from the pituitary of 6M female wildtype mice 1-3; lane 4-6: Protein samples from the pituitary of 6M female ScKO mice 1-3;

lane 1-3: Protein samples from the pituitary of 6M female wildtype mice 1-3; lane 4-6: Protein samples from the pituitary of 6M female ScKO mice 1-3.

**Method used to capture the image:**

Chemiluminescence. The bands were captured by developer and fixing solution on medical blue sensitive x-ray film (Baiyun, China), then the bands on the blots were scanned and analyzed with ImageJ (National Institutes of Health, Bethesda, MD, USA).

S4E\_Fig

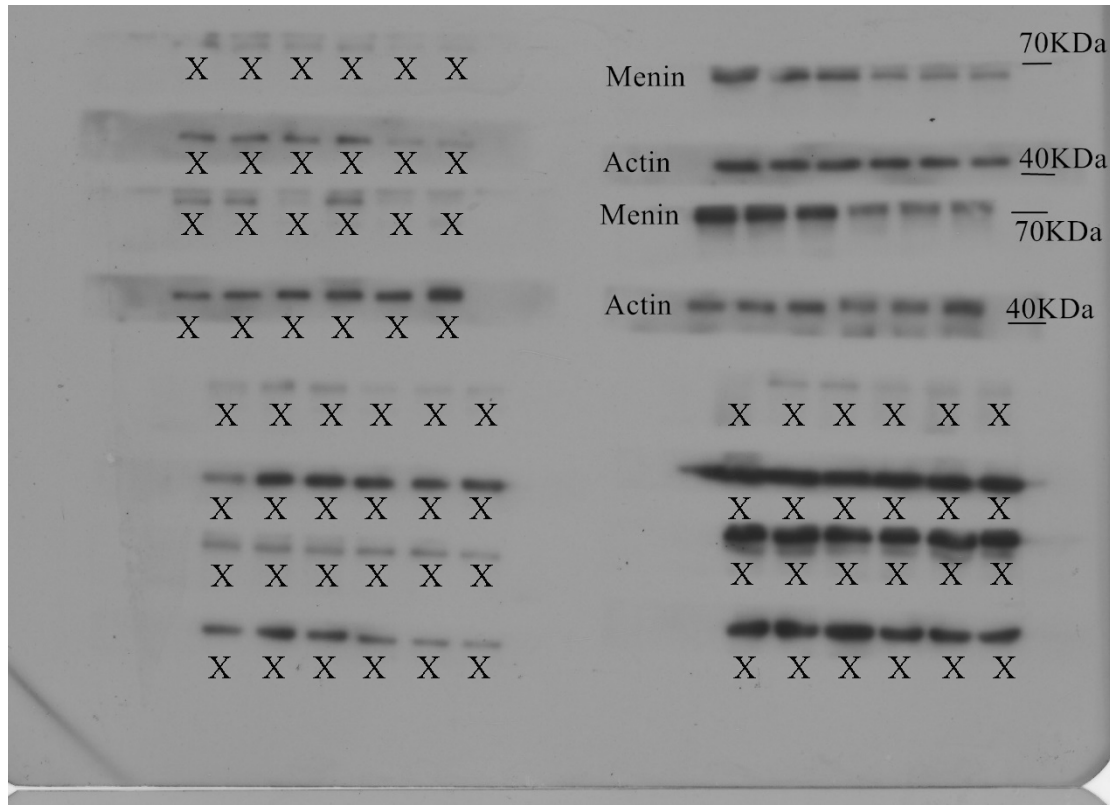

**Loading order** →

**Identity of experimental samples:**

lane 1-3: Protein samples from the sexual grand of 6M male wildtype mice 1-3; lane 4-6: Protein samples from the sexual grand of 6M male ScKO mice 1-3;

lane 1-3: Protein samples from the sexual grand of 6M male wildtype mice 1-3; lane 4-6: Protein samples from the sexual grand of 6M male ScKO mice 1-3;

lane 1-3: Protein samples from the sexual grand of 6M female wildtype mice 1-3; lane 4-6: Protein samples from the sexual grand of 6M female ScKO mice 1-3;

lane 1-3: Protein samples from the sexual grand of 6M female wildtype mice 1-3; lane 4-6: Protein samples from the sexual grand of 6M female ScKO mice 1-3.

**Method used to capture the image:**

Chemiluminescence. The bands were captured by developer and fixing solution on medical blue sensitive x-ray film (Baiyun, China), then the bands on the blots were scanned and analyzed with ImageJ (National Institutes of Health, Bethesda, MD, USA).

S4G\_Fig

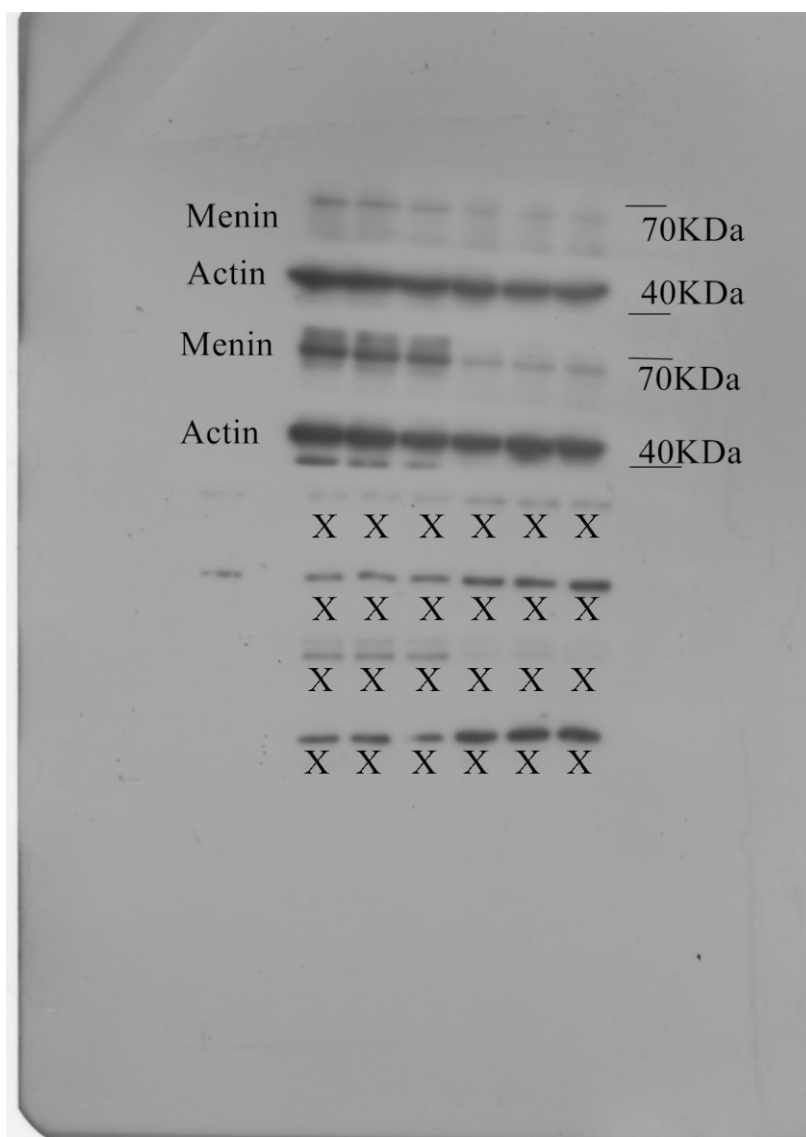

**Loading order** →

**Identity of experimental samples:**

lane 1-3: Protein samples from the spleen of 6M male wildtype mice 1-3; lane 4-6: Protein samples from the spleen of 6M male ScKO mice 1-3;

lane 1-3: Protein samples from the spleen of 6M male wildtype mice 1-3; lane 4-6: Protein samples from the spleen of 6M male ScKO mice 1-3;

lane 1-3: Protein samples from the spleen of 6M female wildtype mice 1-3; lane 4-6: Protein samples from the spleen of 6M female ScKO mice 1-3;

lane 1-3: Protein samples from the spleen of 6M female wildtype mice 1-3; lane 4-6: Protein samples from the spleen of 6M female ScKO mice 1-3.

**Method used to capture the image:**

Chemiluminescence. The bands were captured by developer and fixing solution on medical blue sensitive x-ray film (Baiyun, China), then the bands on the blots were scanned and analyzed with ImageJ (National Institutes of Health, Bethesda, MD, USA)
