# Supplementary material for: Hypothalamic Menin regulates systemic aging and cognitive decline
Source: PLoS Biol. 2023 Mar 16;21(3):e3002033. doi: 10.1371/journal.pbio.3002033 (PMC10019680; doi:10.1371/journal.pbio.3002033)
Supplement: S4 Information — (XLSX) [file pbio.3002033.s016.xlsx]

## Sheet: 4b
D-serine levels in lysates of the hypothalamus from 10 months male control and ScKO mice were determined by ELISA. n=6 mice.
Data represent mean±SEM, n.s.: not significant, *p<0.05, **p<0.01, ***p<0.001, one-way ANOVA with Tukey’s post hoc analysis.
Hypothalamus D-Serine Levels	Control	ScKO
	8.146	4.5694
	7.1283	3.7935
	7.6947	5.0915
	7.3803	5.6847
	6.2429	6.5016
	7.2339	6.9348
	7.304 ± 0.2601 N=6	5.429 ± 0.4834 N=6
	P value	0.0066
	P value summary	**

## Sheet: 4c
D-serine levels in lysates of the hypothalamus from 10 months male AAV-CAG-Cre and AAV-CAG-Cre-Men1f/f mice were determined by ELISA. n=6 mice.
Data represent mean±SEM, n.s.: not significant, *p<0.05, **p<0.01, ***p<0.001, one-way ANOVA with Tukey’s post hoc analysis.
Hypothalamus D-Serine Levels	AAV-CAG-Cre mice	AAV-CAG-Cre-Men1f/f mice
	7.3375	5.6622
	7.4876	6.0321
	7.0202	5.9397
	6.8307	6.7071
	6.2935	6.5542
	7.4847	5.527
	7.076 ± 0.1898 N=6	6.070 ± 0.1932 N=6
	P value	0.004
	P value summary	**

## Sheet: 4e
The protein levels of PHGDH in the hypothalamus from 10 months male AAV-CAG-Cre and AAV-CAG-Cre-Men1f/f mice were measured. n=3 mice.
Data represent mean±SEM, n.s.: not significant, *p<0.05, **p<0.01, ***p<0.001, one-way ANOVA with Tukey’s post hoc analysis.
Hypothalamus Relative mRNA Levels	AAV-CAG-Cre mice	AAV-CAG-Cre-Men1f/f mice
	1.08	0.78
	0.94	0.68
	0.98	0.83
	1.000 ± 0.04163 N=3	0.7633 ± 0.04410 N=3
	P value	0.0175
	P value summary	*

## Sheet: 4f
The mRNA levels of PHGDH in the hypothalamus from 10 months male AAV-CAG-Cre and AAV-CAG-Cre-Men1f/f mice were measured. n=6 mice.
Data represent mean±SEM, n.s.: not significant, *p<0.05, **p<0.01, ***p<0.001, one-way ANOVA with Tukey’s post hoc analysis.
Hypothalamus Relative mRNA Levels	AAV-CAG-Cre mice	AAV-CAG-Cre-Men1f/f mice
	1.28218	0.311249
	1.59668	0.237059
	1.40604	0.21006
	0.51463	0.214327
	0.619093	0.176359
	0.581377	0.179038
	1.000 ± 0.1752 N=6	0.3026 ± 0.01227 N=6
	P value	0.0028
	P value summary	**

## Sheet: 4h
Immunofluorescent staining of PHGDH (Red) and GFP (Green) in the hypothalamus region from 10 months male AAV-CAG-Cre and AAV-CAG-Cre-Men1f/f mice. Quantitation of fluorescence intensity of PHGDH are showed in panel (H), n=3 mice.
Data represent mean±SEM, n.s.: not significant, *p<0.05, **p<0.01, ***p<0.001, one-way ANOVA with Tukey’s post hoc analysis.
VMH FITC/DAPI-Mean Intensity	AAV-CAG-Cre mice	AAV-CAG-Cre-Men1f/f mice
	0.323	0.213
	0.323	0.244
	0.358	0.204
	0.3347 ± 0.01167 N=3	0.2203 ± 0.01212 N=3
	P value	0.0024
	P value summary	**

## Sheet: 4j
ChIP assays using antibodies against H3K4me3 or Menin were performed in cultured wildtype neurons on DIV 12. n=3 independent experiments.
Data represent mean±SEM, n.s.: not significant, *p<0.05, **p<0.01, ***p<0.001, one-way ANOVA with Tukey’s post hoc analysis.
	lgG			H3K4me3
P1	0.0064323	0.003047	0.0055207	0.089251	0.095556	0.092342		P value	< 0.0001	P value summary	****
P2	0.005	0.005	0.005	0.203271	0.084036	0.148223		P value	< 0.0001	P value summary	****
P3	0.004423	0.005523	0.005054	0.540851	0.572603	0.562324		P value	< 0.0001	P value summary	****
P4	0.005	0.005	0.005	0.446253	0.308593	0.372323		P value	< 0.0001	P value summary	****
P5	0.006354	0.00453	0.004116	0.83962	0.743915	0.783234		P value	< 0.0001	P value summary	****
	lgG		H3K4me3
P1	0.0050 ± 0.001011 N=3		0.09238 ± 0.001820 N=3
P2	0.0050 ± 0.0 N=3		0.1452 ± 0.03445 N=3
P3	0.0050 ± 0.0003187 N=3		0.5586 ± 0.009354 N=3
P4	0.0050 ± 0.0 N=3		0.3757 ± 0.03978 N=3
P5	0.0050 ± 0.0006875 N=3		0.7889 ± 0.02777 N=3

## Sheet: 4k
ChIP assays using antibodies against H3K4me3 or Menin were performed in cultured wildtype neurons on DIV 12. n=3 independent experiments.
Data represent mean±SEM, n.s.: not significant, *p<0.05, **p<0.01, ***p<0.001, one-way ANOVA with Tukey’s post hoc analysis.
	lgG			Menin
P1	0.0064323	0.003047	0.0055207	0.019615	0.007631	0.0138273		P value	0.0735	P value summary	ns
P2	0.005	0.005	0.005	0.025409	0.017808	0.020532		P value	0.0019	P value summary	**
P3	0.004423	0.005523	0.005054	0.072334	0.06297	0.067323		P value	< 0.0001	P value summary	****
P4	0.005	0.005	0.005	0.113003	0.168188	0.14232		P value	< 0.0001	P value summary	****
P5	0.006354	0.00453	0.004116	0.426074	0.436929	0.42325		P value	< 0.0001	P value summary	****
	lgG		Menin
P1	0.0050 ± 0.001011 N=3		0.01369 ± 0.003460 N=3
P2	0.0050 ± 0.0 N=3		0.02125 ± 0.002223 N=3
P3	0.0050 ± 0.0003187 N=3		0.06754 ± 0.002705 N=3
P4	0.0050 ± 0.0 N=3		0.1412 ± 0.01594 N=3
P5	0.0050 ± 0.0006875 N=3		0.4288 ± 0.004169 N=3

## Sheet: 4m
AAV-Menin-GFP virous or control virous AAV-GFP were injected into the hypothalamus region of 20 months male mice (Old+AAV:GFP; Old+AAV:Menin-GFP). The protein levels of Menin and PHGDH were measured in the hypothalamus of above mice. n=4 mice.
Data represent mean±SEM, n.s.: not significant, *p<0.05, **p<0.01, ***p<0.001, one-way ANOVA with Tukey’s post hoc analysis.
	Old+AAV:GFP			Old+AAV:Menin-GFP
Menin	0.876466	0.97926	1.14427	3.87376	2.76736	3.5816		P value	0.0021	P value summary	**
PHGDH	1.04674	0.906095	1.04716	1.58422	1.54218	1.75209		P value	0.0014	P value summary	**
	Old+AAV:GFP			Old+AAV:Menin-GFP
Menin	1.000 ± 0.07800 N=3			3.408 ± 0.3310 N=3
PHGDH	1.000 ± 0.04695 N=3			1.626 ± 0.06412 N=3

## Sheet: 4n
AAV-Menin-GFP virous or control virous AAV-GFP were injected into the hypothalamus region of 20 months male mice (Old+AAV:GFP; Old+AAV:Menin-GFP). The mRNA levels of Menin and PHGDH were measured in the hypothalamus of above mice. n=4 mice.
Data represent mean±SEM, n.s.: not significant, *p<0.05, **p<0.01, ***p<0.001, one-way ANOVA with Tukey’s post hoc analysis.
	Old+AAV:GFP				Old+AAV:Menin-GFP
Menin	0.859026	1.07955	1.21035	0.851072	1.55547	2.45778	1.6332	1.55047	P value	0.0151	P value summary	*
PHGDH	1.03067	1.10464	0.999016	0.865674	1.41282	1.30147	1.068	1.64556	P value	0.0335	P value summary	*
	Old+AAV:GFP				Old+AAV:Menin-GFP
Menin	1.000 ± 0.08786 N=4				1.799 ± 0.2203 N=4
PHGDH	1.000 ± 0.04995 N=4				1.357 ± 0.1201 N=4

## Sheet: 4o
D-Serine levels in the hypothalamus from 20 months male Old+AAV:GFP and Old+AAV:Menin-GFP mice were determined by ELISA. n=4 mice.
Data represent mean±SEM, n.s.: not significant, *p<0.05, **p<0.01, ***p<0.001, one-way ANOVA with Tukey’s post hoc analysis.
D-Serine Levels	Old+AAV:GFP	Old+AAV:Menin-GFP
	8.845	9.977		P value	0.0403
	6.971	8.054		P value summary	*
	6.381	9.628
	7.238	12.154
	7.359 ± 0.5268 N=4	9.953 ± 0.8444 N=4
